Running head: NARRATIVE AND ARGUMENTATIVE THOUGHT

## **Brain Network Reconfiguration for Narrative and Argumentative Thought**

Yangwen Xu<sup>1,2\*</sup>, Lorenzo Vignali<sup>1,2</sup>, Olivier Collignon<sup>1,3</sup>, Davide Crepaldi<sup>2</sup>, Roberto Bottini<sup>1</sup>

(1) University of Trento, Italy (2) International School for Advanced Studies, Italy (3) University of Louvain, Belgium

\*Correspondence:

Yangwen Xu, Ph.D.

Center for Mind/Brain Sciences (CIMeC), University of Trento

Via delle Regole 101, 38123, Mattarello (TN), Italy

Phone: +390461283010

Email: [yangwen.xu@unitn.it](mailto:yangwen.xu@unitn.it)

## NARRATIVE AND ARGUMENTATIVE THOUGHT

### 1 **Abstract (max 150 words)**

2 Our brain constructs reality through narrative and argumentative thought. Some hypotheses argue that  
3 these two modes of cognitive functioning are irreducible, reflecting distinct mental operations underlain  
4 by separate neural bases; Others ascribe both to a unitary neural system dedicated to long-timescale  
5 information. We addressed this question by employing inter-subject measures to investigate the stimulus-  
6 induced neural responses when participants were listening to narrative and argumentative texts during  
7 fMRI. We found that following both kinds of texts enhanced functional couplings within the frontoparietal  
8 control system. However, while a narrative specifically implicated the default mode system, an argument  
9 specifically induced synchronization between the intraparietal sulcus in the frontoparietal control system  
10 and multiple perisylvian areas in the language system. Our findings reconcile the two hypotheses by  
11 revealing commonalities and differences between the narrative and the argumentative brain networks,  
12 showing how diverse mental activities arise from the segregation and integration of the existing brain  
13 systems.

14

15 Keywords: narrative, argument, inter-subject correlation, inter-subject functional connectivity, brain  
16 network

## NARRATIVE AND ARGUMENTATIVE THOUGHT

### 17 **Introduction**

18 "To say that all human thinking is essentially of two kinds – reasoning on the one hand, and narrative,  
19 descriptive, contemplative thinking on the other – is to say only what every readers' experience will  
20 corroborate."

21 *William James*

22

23 Humans are thinking animals. Flows of concepts and ideas pass through our minds from time to time.  
24 These concepts and ideas are seldom in isolation; they are often sequentially connected, composed into a  
25 mental discourse, which has been called the "train of thought" (Hobbes, 1651). Psychologists argued for  
26 decades that these complex thoughts are essentially of two natural kinds, each gluing its elements in a  
27 different manner (Bruner, 1986; James, 1983): The narrative thought comprises a series of events, which  
28 unfold through temporal causality and implied purpose (Beach and Bissel, 2016). The argumentative  
29 thought consists of a chain of propositions, forming the interlinked premiss-illative-conclusion structure,  
30 according to which a final conclusion is reached through progressive inferences (Hitchcock, 2007).

31 Despite the fact that both modes of thought are pervasive in our mental life, most neuroimaging  
32 studies merely focused on the neural basis of narrative thought (Kemmerer, 2014; Mar, 2004). In these  
33 studies, a narrative text is divided into its constituent sentences, and the order of these sentences is  
34 randomized to form a sentence-scrambled version of the text. The conditions presenting the intact texts  
35 are contrasted to conditions presenting the sentence-scrambled texts. As participants can only generate a  
36 coherent narrative discourse in the intact-text condition, this contrast outstands the neural basis of narrative  
37 thought from the one of linguistic processing regarding word meaning and syntax. A meta-analysis of 12  
38 such neuroactivation studies indicates that narratives consistently induced greater activation than the  
39 sentence-scrambled text in the anterior temporal lobe, temporoparietal junction, precuneus, and medial

## NARRATIVE AND ARGUMENTATIVE THOUGHT

40 prefrontal cortex (Ferstl et al., 2008); a set of regions that coincides with the default mode network (DMN)  
41 (Buckner et al., 2008). Instead of investigating the overall level of activation, recent studies demonstrate  
42 that the DMN activity can also capture the dynamic progress in a narrative (Lerner et al., 2011; Simony  
43 et al., 2016). As it is hard to obtain an explicit event-related response model that can describe a narrative  
44 discourse, these studies used one individual's neural response to model another's by measuring the shared  
45 neural responses across participants when they were listening to the same narrative (Nastase et al., 2019).  
46 For instance, one study using the inter-subject correlation (ISC) method find that listening to the same  
47 narrative synchronizes the blood-oxygen-level-dependent (BOLD) fluctuations in the same regions of the  
48 DMN across subjects; listening to the same sentence-scrambled text does not (Lerner et al., 2011). Another  
49 study further illustrates such higher synchronization in the DMN not only exist between the same regions  
50 across subjects (i.e., ISC) but also between different regions across subjects (i.e., the inter-subject  
51 functional connectivity, ISFC) (Simony et al., 2016). The later findings demonstrate that regions in the  
52 DMN underlie narrative thought by coordinating with each other as a network.

53         What are the neural bases of argumentative thought? There are two hypotheses (Jacoby and  
54 Fedorenko, 2018). The content-dependent hypothesis inherits the two modes of thought view, suggesting  
55 the narrative and the argumentative thought are irreducible to one another (Bruner, 1986; James, 1983);  
56 they reflect distinct mental operations, which should correspond to separate neural bases. Tracing a  
57 narrative plot relies on constructing and updating the representation of a state of affairs, i.e., "situation  
58 model" (Zwaan and Radvansky, 1998), to simulate the temporal causality and to infer the characters'  
59 intentions. This set of cognitive functions is indeed attributed to the DMN, which plays a role in mental  
60 simulation and theory of mind (Buckner et al., 2008). Following an argument, instead, relies on identifying  
61 and evaluating the logical structure embedded in the use of natural language, i.e., "informal logic" (Blair,



## NARRATIVE AND ARGUMENTATIVE THOUGHT

62 2015). This set of cognitive functions might warrant cooperation between the language and the reasoning  
63 brain system.

64 On the contrary, the content-independent hypothesis suggests that the narrative and the  
65 argumentative thought are fundamentally the same; they share the same neural mechanism. One  
66 commonality of these two modes of thought is that the content at each time point relates to the context  
67 established at previous time points. Iteratively accumulating information over time and holding the  
68 information online over a long timescale seems equally crucial to framing a coherent narrative and a valid  
69 argument. According to the hierarchical process memory framework, all the cortical circuits accumulate  
70 information over time, but their processing timescale increases along the hierarchical topography, from  
71 milliseconds in primary sensory regions to minutes in high-order regions (Hasson et al., 2015). This  
72 framework suggests that the DMN, which is at the top of the topographical hierarchy (Margulies et al.,  
73 2016; Sepulcre et al., 2012), supports narrative thought by virtue of its wide temporal receptive window  
74 (TRW), integrating information over a long timescale, e.g., up to minutes (J. Chen et al., 2016). As a wide  
75 TRW is also crucial to the progress of an argumentative thought, the DMN might potentially serve as  
76 general machinery for long-timescale information integration, supporting both narrative and  
77 argumentative thought.

78 Testing these two hypotheses requires to fill the vacancy of studies on argumentative thought. Here,  
79 we investigated the neural correlates of both narrative and argumentative thought by contrasting the BOLD  
80 signal elicited by two narrative texts and two argumentative texts to the signal elicited by their  
81 corresponding sentence-scrambled version (Table 1). We also acquired the BOLD signal during the  
82 resting state as a baseline. Specifically, we employed ISC and the ISFC as measures to respectively  
83 investigate the stimulus-induced regional activity and interregional functional coupling during the  
84 narrative and the argumentative thought. The content-independent hypothesis will predict a higher ISC or

## NARRATIVE AND ARGUMENTATIVE THOUGHT

85 ISFC in the DMN in both the narrative and the argumentative conditions compared to their corresponding  
86 sentence-scrambled conditions. The content-dependent hypothesis, instead, will predict a higher ISC or  
87 ISFC in the DMN only when the narrative condition and its sentence-scrambled condition are compared;  
88 alternative brain networks that relate to language and reasoning will engage in the discourse-level  
89 comprehension of argumentative texts.

## NARRATIVE AND ARGUMENTATIVE THOUGHT

### 90 **Results**

#### 91 *Behavior rating on stimuli*

92 Table 1 shows the information on the two selected narrative texts and the two selected argumentative texts  
93 (see Methods for more detailed information). These texts were divided into segments consisting of  
94 complete sentences, each one ending with a period, question mark, exclamation mark, colon, or semi-  
95 colon. We sorted the segments according to random order and concatenated them together to generate a  
96 sentence-scrambled version for each text. The number of words, duration, number of segments, number  
97 of words of each segment, and the duration of each segment were matched between narrative texts and  
98 argumentative texts. These measurements were also comparable to those in the previous studies using ISC  
99 (Lerner et al., 2011) and ISFC (Simony et al., 2016) methods.

100 At the stimuli-selection stage, we rated narrative- and argument-relevant features of these texts on  
101 a five-point Likert scale (Fig. 1). The questionnaire used to query these features can be found in the  
102 supplementary materials. Each text was rated by 20 participants who did not participate in the MRI  
103 experiment (see Methods for more detailed information). The results confirmed that the two narrative texts  
104 had higher ratings than the two argumentative texts on narrative-related features such as narrativeness  
105 (Welch's  $t(77.81) = 20.11$ ;  $P < 0.001$ ), concreteness (Welch's  $t(69.93) = 3.39$ ;  $P = 0.001$ ), scene  
106 construction (Welch's  $t(52.52) = 9.24$ ;  $P < 0.001$ ), self-projection (Welch's  $t(68.92) = 5.18$ ;  $P < 0.001$ ),  
107 and theory of mind (Welch's  $t(77.97) = 3.99$ ;  $P < 0.001$ ) (Figure 1a). The two argumentative texts received  
108 higher ratings than the two narrative texts on argument-related features such as argumentativeness  
109 (Welch's  $t(78.00) = -10.36$ ,  $P < 0.001$ ), abstractness (Welch's  $t(78.00) = -11.51$ ,  $P < 0.001$ ), and logical  
110 thinking (Welch's  $t(77.81) = -11.03$ ,  $P < 0.001$ ) (Fig. 1b).

111 The 16 participants who took part in the fMRI experiment filled in the same rating questionnaire  
112 after scanning. The results largely validated the above rating patterns (Supplementary Fig. 1). In the

## NARRATIVE AND ARGUMENTATIVE THOUGHT

113 questionnaire, these participants also rated to which degree they understood the texts on a five-point Likert  
114 scale. The results showed that they understood the intact texts better than the sentence-scrambled texts:  
115 The comprehensibility rating on the intact narrative texts (mean  $\pm$  SD: 4.69  $\pm$  0.51) was significantly  
116 higher than the scrambled narrative texts (mean  $\pm$  SD: 2.63  $\pm$  0.67) (pair  $t(15) = 15.17$ ,  $P < 0.001$ ), and  
117 the comprehensibility rating on the argumentative texts (mean  $\pm$  SD: 4.41  $\pm$  0.74) was significantly higher  
118 than the scrambled argumentative texts (mean  $\pm$  SD: 2.97  $\pm$  0.99) (pair  $t(15) = 8.46$ ,  $P < 0.001$ ).

119

120 *Narrative, not argumentative texts, evoked time-locked neural activity in the DMN*

121 We first investigated the time-locked regional activity evoked by narrative and argumentative thought by  
122 comparing the ISC in the intact-text conditions when the participants could construct coherent thoughts  
123 to the ISC in the scrambled-sentence conditions when participants could only process the literal meaning  
124 of each sentence (Fig. 2). To recognize which brain systems are engaged in narrative and argumentative  
125 thought, we calculated the percentage of significant brain areas (i.e., the number of vertexes) that fall into  
126 each pre-identified brain system. The distribution of each brain system was identified based on a study  
127 applying clustering analysis on the interregional connectivity pattern (Thomas Yeo et al., 2011)  
128 (Supplementary Fig. 2; see Methods for details).

129 As a sanity check, we examined the contrast between the scrambled-sentence condition and the  
130 resting-state condition. We predicted that sentence-scrambled texts should mainly synchronize the  
131 auditory, language, and domain-general process across participants. The results confirmed this prediction  
132 by showing that, independently of text type (narrative or argumentative), about 90% of significant vertexes  
133 fell into the four brain systems relating to auditory, language, control, and attention ( $P < 0.05$ , FDR  
134 corrected, area  $> 200$  mm<sup>2</sup>; Fig. 2, first row; Supplementary Fig. 2b, first row).

## NARRATIVE AND ARGUMENTATIVE THOUGHT

135 We moved on to investigate the neural correlates of narrative and argumentative thought by  
136 detecting the regions that show additional or higher synchronization in the intact-text condition compared  
137 to the scrambled-sentence condition ( $P < 0.05$ , FDR corrected, area  $> 200 \text{ mm}^2$ ; Fig. 2, second and third  
138 row; Supplementary Fig. 2b, second and third row). The results contrasting intact-narrative condition to  
139 the resting-state condition showed a much wider distribution of brain areas than the results contrasting  
140 scrambled-sentence condition to the resting-state condition. Note that, in the intact-narrative condition,  
141 18% of significant regions fell into the DMN, whereas in the scrambled-narrative condition, this portion  
142 was less than 1%. Directly contrasting the intact-narrative condition to the scrambled-narrative condition  
143 revealed about 90% of significant regions fell in four brain systems: the default mode, language, control,  
144 and attention, of which 37% were in the DMN. Specifically, the significant regions in the DMN included  
145 the angular gyrus (AG), the area comprising the precuneus, the posterior cingulate cortex (PCC), and the  
146 ventral retrosplenial complex (RSC), and the middle portion of the left peri-hippocampal area. Intriguingly,  
147 contrasting intact-argumentative condition to the resting-state condition only showed brain areas confined  
148 within the brain areas that emerge when contrasting the scrambled-sentence condition to the resting-state  
149 condition. Directly contrasting the intact-argumentative condition to the scrambled-argumentative  
150 condition did not reveal any additional brain areas, even at a lower threshold ( $P < 0.001$ , uncorrected).

151 We also contrasted the ISC result of narrative thought to the argumentative one, i.e., (Intact  
152 Narrative - Scrambled Narrative)  $>$  (Intact Argument - Scrambled Argument) ( $P < 0.05$ , FDR corrected,  
153 area  $> 200 \text{ mm}^2$ ; Supplementary Fig 3). The significant brain areas coincided with the results of the  
154 narrative thought: Over 90% of the significant regions fell into the default mode, language, control, and  
155 attention systems, of which 25% were in the DMN. The opposite contrast did not reveal any region more  
156 involved in the argumentative thought than the narrative one, even at a lower threshold ( $P < 0.001$ ,  
157 uncorrected).

## NARRATIVE AND ARGUMENTATIVE THOUGHT

158 To validate the above results and to evaluate the across-stimuli consistency, we repeated the  
159 analysis on each of the two narrative texts (Supplementary Fig. 4) and the two argumentative texts  
160 (Supplementary Fig. 5) ( $P < 0.05$ , FDR corrected, area  $> 200 \text{ mm}^2$ ). The results showed an overall  
161 consistency between the two texts of the same type despite the considerable difference in content and  
162 writing style. For the two narrative texts, contrasting the intact-text condition to the scrambled-sentence  
163 condition revealed significant brain areas that mostly overlapped in the DMN, i.e., the precuneus and the  
164 posterior angular gyrus. For the two argumentative texts, the same contrast did not reveal any significant  
165 brain areas.

166 The above ISC analysis verifies the previous findings that the DMN engages in narrative thought  
167 (Ferstl et al., 2008; Lerner et al., 2011), but fails to reveal the neural basis for the argumentative one. It  
168 seems that the DMN does not serve as the general machinery for long-timescale information integration,  
169 supporting both modes of thought.

170  
171 *Network reconfiguration for narrative and argumentative thought*

172 It is worth noting that the ISC analysis investigates the stimulus-induced neural activity region by region  
173 in isolation. Constructing a coherent thought throughout a relatively long text might rely on the  
174 reconfiguration of brain networks already active during sentence-level processing, without necessarily  
175 recruiting additional brain regions. As the ISFC measures the purely stimulus-induced functional coupling  
176 between discrete regions (Simony et al., 2016), it can reflect the brain network reconfigurations across  
177 different task states. The current analysis aimed to investigate the network reconfiguration for narrative  
178 and argumentative thought by comparing the ISFC in the intact-text conditions to those in the scrambled-  
179 sentence conditions (Fig. 3 and Fig. 4).

## NARRATIVE AND ARGUMENTATIVE THOUGHT

180 We implemented the ISFC analysis based on a whole-brain parcellation atlas comprising 200 brain  
181 regions (Schaefer et al., 2018). The atlas also provides information about which brain system each of the  
182 200 brain areas belong to. Fig. 3 and Fig. 4 illustrate the network reconfiguration in the narrative  
183 conditions and the argumentative conditions, respectively. The left panel in both figures shows the  
184 network layout of all the significant ISFC differences between conditions ( $P < 0.05$ , FWE corrected) using  
185 the force-directed graph drawing algorithm (Fruchterman and Reingold, 1991), where strongly connected  
186 nodes cluster together, and weakly connected nodes are pushed apart. The nodes represent brain areas of  
187 each brain system, where the size of nodes denotes the node degree, i.e., the sum of edges that connect to  
188 the nodes. The edges represent the significant interregional ISFC difference, where the width of edges  
189 denotes the standardized effect size of the contrast (SES). The right panel in both figures summarizes the  
190 edge distribution within and between brain systems. Each cell denotes the mean SES, i.e., the ratio  
191 between the sum of all the significant edges and the number of all the possible edges in the fully connected  
192 situation.

193 For narrative conditions, the ISFC results were mostly in line with the ISC results. Scrambled-  
194 narrative texts, in contrast to the resting state, synchronized the neural activity mainly in the brain systems  
195 relating to auditory, language, control, and ventral attention (Fig. 3, the first row). Intact-narrative texts,  
196 in contrast to the resting state, extended the synchronization to the DMN (Fig. 3, the second row). A direct  
197 comparison between the intact-narrative condition and the scrambled-narrative condition was  
198 implemented by detecting the edges that simultaneously met the criteria (1) Intact Narrative > Scrambled  
199 Narrative ( $P < 0.05$ , FWE corrected) and (2) Intact Narrative > Resting State ( $P < 0.05$ , FWE corrected).  
200 The significant edges mainly fell into the brain systems relating to the default mode, language, control,  
201 and dorsal attention. (Fig. 3, the third row). Supplementary Fig. 6a illustrates the top 20 edges with the  
202 biggest SES within the DMN. These critical functional couplings covered all the core regions in the DMN,

## NARRATIVE AND ARGUMENTATIVE THOUGHT

203 i.e., the AG (Brodmann area 39), the dorsal lateral prefrontal cortex (8Ad area) (Petrides, 1999), the  
204 anterior medial prefrontal cortex, the PCC, the ventral RSC, and the parahippocampal area. The result  
205 confirmed previous findings that areas in the DMN are synchronized as a network to support the narrative  
206 thought (Simony et al., 2016).

207 For argumentative conditions, scrambled-argumentative texts, in contrast to the resting state, also  
208 synchronized the neural activity mainly in the brain systems relating to auditory, language, control, and  
209 ventral attention (Fig. 4, the first row). Intact-argumentative texts seemed not to involve additional brain  
210 systems. Most of the significant edges were within the language system (Fig. 4, the second row). A direct  
211 comparison between the intact-argumentative condition and the scrambled-argumentative condition was  
212 conducted by detecting the edges that simultaneously met the criteria (1) Intact Argument > Scrambled  
213 Argument ( $P < 0.05$ , FWE corrected) and (2) Intact Argument > Resting State ( $P < 0.05$ , FWE corrected).  
214 The significant edges were mostly within the control system or connected the control and the language  
215 systems. Not even a single significant edge fell into the DMN. Supplementary Fig. 6b illustrates the top  
216 20 edges with the biggest SES in all the brain systems. All these critical functional couplings were between  
217 the control system and the language systems. More specifically, they were the one-to-many connections  
218 from the bilateral anterior bank of the intraparietal sulcus (IPS) in the control system to multiple  
219 perisylvian areas in the language system including the orbital frontal cortex (Brodmann area 47), the dorsal  
220 lateral part of the temporal pole, the whole length of superior temporal gyrus/sulcus (STG/STS, Brodmann  
221 area 22), and the temporoparietal junction (TPJ).

222 We also validated the above results and evaluated the inter-stimuli consistency within the same  
223 text type by repeating the analysis on each of the two narrative texts (Supplementary Fig. 7) and each of  
224 the two argumentative texts (Supplementary Fig. 8). The results indicated a substantial level of  
225 consistency between the different texts of the same type.



## NARRATIVE AND ARGUMENTATIVE THOUGHT

226

227 *Commonalities and differences between narrative and argumentative networks*

228 Next, we disentangled the brain network shared by both narrative and argumentative thought from the  
229 brain network specific to narrative or argumentative thought. The shared brain network for both narrative  
230 and argumentative thought was defined as the functional couplings which met the following criteria  
231 simultaneously: (1) Intact Narrative > Resting State ( $P < 0.05$ , FWE corrected); (2) Intact Narrative >  
232 Scrambled Narrative ( $P < 0.05$ , FWE corrected); (3) Intact Argument > Resting State ( $P < 0.05$ , FWE  
233 corrected); (4) Intact Argument > Scrambled Argument ( $P < 0.05$ , FWE corrected). We found 88 edges  
234 that meet these criteria (Figure 5a). Most of the functional couplings were in the control system; the others  
235 were mainly within the language system or between the language and control system (Figure 5b). Figure  
236 5c illustrates the SES of the 88 edges of the contrast between each condition and the resting state. The  
237 SES in the intact condition was greater than the one in the scrambled condition for all the four texts  
238 regardless they were narrative or argumentative. Figure 5d illustrates the top 20 edges with the largest  
239 averaged SES in the contrasts between intact-narrative condition and scrambled-narrative condition and  
240 between intact-argumentative condition and scrambled-argumentative condition. Most edges linked areas  
241 within the control system. They connected the anterior bank of the IPS to multiple lateral prefrontal  
242 regions and the temporooccipital area at the temporal entrance.

243 The brain network more sensitive to narrative thought was defined as the functional coupling  
244 which met the following criteria: (1) (Intact Narrative – Scrambled Narrative) > (Intact Argument –  
245 Scrambled Argument) ( $P < 0.05$ , FWE correction); (2) Intact Narrative > Scrambled Narrative ( $P < 0.05$ ,  
246 FWE correction); (3) Intact Narrative > Resting State ( $P < 0.05$ , FWE correction). We found 2348 edges  
247 that met these criteria (Figure 6a). These edges mainly related to the language, default mode, control, and  
248 dorsal attention systems (Figure 6b). There were 96 edges in the DMN. Figure 6c illustrates the SES of

## NARRATIVE AND ARGUMENTATIVE THOUGHT

249 these 96 edges of the contrast between each condition and the resting state. The SES in the intact-narrative  
250 conditions was greater than the one in the scrambled-narrative conditions. However, the SES in the intact-  
251 argumentative conditions was not greater than the one in the scrambled-argumentative conditions. Figure  
252 6d illustrates the top 20 edges in the DMN with the largest SES in the "(Intact Narrative – Scrambled  
253 Narrative) > (Intact Argument – Scrambled Argument)" contrast. These edges covered all the core regions  
254 in the DMN, including the AG (Brodmann area 39), the dorsal lateral prefrontal cortex (8Ad area)  
255 (Petrides, 1999), the anterior medial prefrontal cortex, the PCC, the ventral RSC, and the parahippocampal  
256 area.

257 The brain network specific to argumentative thought was defined as the functional coupling which  
258 met the following criteria: (1) (Intact Argument - Scrambled Argument) > (Intact Narrative – Scrambled  
259 Narrative) ( $P < 0.05$ , FWE correction); (2) Intact Argument > Scrambled Argument ( $P < 0.05$ , FWE  
260 correction); (3) Intact Argument > Resting State ( $P < 0.05$ , FWE correction). We found 64 edges that met  
261 these criteria (Figure 7a). These edges mainly connected the control and the language systems (Figure 7b).  
262 Figure 7c illustrates the SES of these 64 edges of the contrast between each condition and the resting state.  
263 The SES in the intact-argumentative conditions was greater than the one in the scrambled-argumentative  
264 conditions. However, the SES in the intact-narrative conditions was not greater than the one in the  
265 scrambled-narrative conditions. Figure 7d illustrates the top 20 edges in the whole brain with the largest  
266 SES in the "(Intact Argument – Scrambled Argument) > (Intact Narrative – Scrambled Narrative)" contrast.  
267 Most of the edges connected the control system and the language systems, more specifically, the one-to-  
268 many connections between the bilateral anterior bank of the IPS in the control system and multiple  
269 perisylvian areas in the language system, including the orbital frontal cortex (Brodmann area 47), the  
270 dorsal lateral part of the temporal pole, the whole length of STG/STS (Brodmann area 22), and the TPJ.  
271

## NARRATIVE AND ARGUMENTATIVE THOUGHT

### 272 **Discussion**

273 To investigate the neural basis of the narrative and argumentative thought, we compared the stimuli-  
274 evoked regional neural activity and functional coupling when participants were listening to narrative and  
275 argumentative texts to those when participants were listening to sentence-scrambled text. We found that  
276 the sentence-scrambled texts, whether they were narrative or argumentative, induced regional neural  
277 activity and functional coupling mainly in the brain systems relating to auditory, language, attention, and  
278 control (first row in Fig. 2, Fig. 3, and Fig. 4). While the intact-narrative condition additionally involved  
279 the DMN, the intact-argumentative condition did not extend to other brain systems (second row in Fig. 2,  
280 Fig. 3, and Fig. 4). Directly contrasted to the scrambled-sentence conditions, both intact-narrative  
281 condition and intact-argumentative condition enhanced functional coupling mainly in the frontoparietal  
282 control system (Fig. 5). The intact-narrative condition in contrast to the scrambled-narrative condition also  
283 induced widely distributed neural activity and functional coupling that implicated the core regions in the  
284 DMN (third row in Fig. 2 and Fig. 3; Fig. 6). However, we failed to find any neural activity or functional  
285 coupling in the DMN when contrasting the intact-argumentative condition to the scrambled-argumentative  
286 condition (third row in Fig. 2 and Fig. 4; Fig. 6c). Instead, we found functional couplings between the  
287 anterior bank of the IPS in the control system and multiple perisylvian areas in the language system (Fig.  
288 7). These one-to-many connections were not significant in the contrast between the intact-narrative  
289 condition and the scrambled-narrative condition (Fig. 7c). We also validated our results by implementing  
290 the same analyses on each of the two selected texts of the same types. The pattern of the result was  
291 consistent with the one pooling two texts together (Supplementary Fig. 4, Fig. 5, Fig. 7, Fig. 8).

292 The results revealed the commonalities and differences between neural bases underlying narrative  
293 and argumentative thought, which seems to support both content-independent and content-dependent  
294 hypotheses (Jacoby and Fedorenko, 2018). The content-independent hypothesis predicts that the narrative

## NARRATIVE AND ARGUMENTATIVE THOUGHT

295 and the argumentative thoughts should share the same neural basis because the coherence of both modes  
296 of thought relies on iteratively accumulating and updating information over a long timescale. Instead of  
297 the DMN, we found the shared neural basis for both narrative and argumentative thought in the  
298 frontoparietal control system. The frontoparietal control system, together with the attention-relevant  
299 regions in cingulo-opercular areas, is usually referred to as the "multiple demand system" (Duncan, 2010),  
300 which is named after its broad engagement in a wide variety of demanding tasks (Fedorenko et al., 2013).  
301 However, unlike the sustained activity in the attention-relevant brain area, the frontoparietal control  
302 system rapidly adjusts its activity profile (MacDonald et al., 2000) and global functional connectivity  
303 pattern (Cole et al., 2013) to adapt to the task context. Our results suggest that both modes of thought may  
304 rely on the frontoparietal control system as a general working memory system to iteratively accumulating  
305 and updating information over long temporal windows.

306 The content-dependent hypothesis predicts that the neural bases underlying narrative and  
307 argumentative thought are irreducible to each other as these two modes of thought differ in their core  
308 cognitive components. As mentioned in the Introduction, the narrative thought relies on constructing and  
309 updating a "situation model" about the state of affairs to understand the temporal causality of the events  
310 and the intention of the characters (Zwaan and Radvansky, 1998). The argumentative thought, instead,  
311 relies on "informal logic" processing, which includes identification and evaluation of the logic structures  
312 that are embedded in the natural language discourse (Blair, 2015). The findings that the DMN was specific  
313 for narrative thought, and the cooperation between the control and the language systems via the IPS was  
314 specific for argumentative thought, may support this hypothesis. The functionality of situation model  
315 construction coincides with the role of the DMN in scene construction (Hassabis and Maguire, 2007;  
316 Spreng et al., 2009), self-projection (Buckner and Carroll, 2007; Spreng et al., 2009), prospection  
317 (Schacter et al., 2007; Spreng et al., 2009), and theory of mind (Lin et al., 2018; Spreng et al., 2009). The

## NARRATIVE AND ARGUMENTATIVE THOUGHT

318 IPS, together with other brain areas in the frontoparietal control systems, is considered as the neural basis  
319 of fluid intelligence (Bishop et al., 2008). Thus, the coordination and cooperation between the  
320 frontoparietal control system and the language system, which is mediated by the IPS, might be critical to  
321 identify and evaluate the informal logic in the natural language discourse.

322         How to reconcile these two seemingly opposing hypotheses? A likely possibility is that the brain  
323 function is simultaneously featured by two factors: the temporal receptive window (TRW) for information  
324 processing and the information types. Take the frontoparietal control system and the default mode system  
325 as an example. On the one hand, according to the hierarchical process memory framework (Hasson et al.,  
326 2015), the TRW of a brain system is defined by its position in the cortical hierarchy. In terms of  
327 connectivity pattern, the frontoparietal control system and the default mode system are at the medial and  
328 top level of the cortical hierarchy, respectively (Margulies et al., 2016; Sepulcre et al., 2012). They thus  
329 can process longer-timescale information (e.g., the “train of thought”) than the sensorimotor cortices at  
330 the low level of the cortical hierarchy. On the other hand, the information type processed by a brain system  
331 is defined by its wiring patterns to the other functionally specialized brain modules. The frontoparietal  
332 control system, which has widely distributed connections to the other brain systems (Power et al., 2011),  
333 can serve as the general machinery to integrate long-timescale information of all kinds. The default mode  
334 system, which has strong connections mainly to the medial temporal lobe, is more likely an extension to  
335 the episodic memory system (Buckner et al., 2008), which is sensitive to the narrative information. Given  
336 the default mode system is at an even higher level of in the cortical hierarchy than the frontoparietal control  
337 system (Margulies et al., 2016; Sepulcre et al., 2012), the default mode system could have the capacity to  
338 process longer narrative information than the domain-general information which is processed by the  
339 frontoparietal control system. If this is true, it might be the reason to explain why narratives tend to be  
340 more accessible and memorable than the other genres (Graesser et al., 1980; Zabrocky and Moore, 1999).

## NARRATIVE AND ARGUMENTATIVE THOUGHT

341 Our study also indicates the importance of treating the brain as a network and illustrates how  
342 diverse mental activities arise from network reconfiguration. There are two general mechanisms at play  
343 (Park and Friston, 2013). One mechanism is through local integration. The brain was organized into  
344 functionally specialized modular structures, where the areas within the module are densely connected  
345 (Thomas Yeo et al., 2011). Each module can be selectively recruited as a functional unit according to  
346 task requirements by enhancing its within-module functional couplings. For example, compared to the  
347 scrambled-text condition, the intact-narrative condition selectively involved the default mode system  
348 (Figure 3) by inducing the functional couplings among all the core regions with the DMN (Supplementary  
349 Fig 6a; Fig. 6). Another mechanism is through global integration, which means these recruited modules  
350 are coordinated by inter-module connections, aiming to achieve more complicated tasks. Unlike the dense  
351 intra-module connections, these inter-module connections are looser, and are usually mediated by a small  
352 number of brain areas, termed "connectors." A prominent example is the neural basis of argumentative  
353 thought. In the scrambled-argumentative condition, the language and control systems were already  
354 involved but segregated (Figure 4). The intact-argumentative condition did not recruit additional brain  
355 systems. Instead, it promoted the cooperation between the control and language systems, and this  
356 cooperation is achieved strictly through the IPS, as the connector (Supplementary Fig 6b; Fig 7). The  
357 global integration of the local integration strategy guarantees the efficiency and flexibility of brain  
358 function, where the functionally specialized brain modules can be combined and coordinated to adapt  
359 diverse task context.

360 To conclude, our study revealed the commonalities and differences in brain network  
361 reconfiguration for the narrative and the argumentative thought. While both modes of thought rely on the  
362 frontoparietal control system, the narrative thought specifically implicates the DMN, and the  
363 argumentative thought specifically requires the cooperation between the control and the language systems,

## NARRATIVE AND ARGUMENTATIVE THOUGHT

364 mediated by the IPS. These results provide insights into how the brain generates diverse mental activity  
365 through global and local brain network integration.

## NARRATIVE AND ARGUMENTATIVE THOUGHT

### 366 **Methods**

#### 367 *Participants*

368 Twenty native Italian speakers who had no history of neurological or psychiatric disorders participated in  
369 the fMRI experiment. They were paid as compensation for their time. Following the experimental protocol  
370 approved by the local ethical committee at the University of Trento, all participants provided informed  
371 written consent before the start of the experiment. Data from four participants were discarded: One  
372 participant performed badly in the post-scanning questionnaire concerning the content of the narrative and  
373 argumentative texts used in the experiment (his/her accuracy was outside 1.5 times the interquartile range  
374 below the lower quartile across participants (Supplementary Fig. 9)). Three participants were excluded  
375 due to excessive head motion; In two cases, the mean frame displacement index (Power et al., 2014) of  
376 functional images was outside 1.5 times the interquartile range above the upper quartile across participants  
377 (Supplementary Fig. 8), and one's structure image was so blurry that failed to be segmented. The remaining  
378 16 participants (9 females; age range: 21 to 31, mean age: 24) were all educated (university students or  
379 above) and right-handed (laterality quotient range: +40 to +100; mean: +90) (Oldfield, 1971). This sample  
380 size was in line with the studies employing ISC (Lerner et al., 2011) and ISFC (Simony et al., 2016)  
381 methods (11 and 18 participants, respectively).

382

#### 383 *Stimuli*

384 This study employed a two (narrative vs. argumentative text) by two (intact vs. sentence-scrambled  
385 version) design. We generated two stimuli for each of these four conditions following the procedure below.  
386 First, we searched for narrative and argumentative texts that met the following criteria: (1) Written in  
387 modern Italian. (2) Easy to understand. All the texts come from best-sellers for non-expert readers. (3)  
388 Typical. The narrative text includes a story with the typical elements of the story grammar (Rumelhart,



## NARRATIVE AND ARGUMENTATIVE THOUGHT

389 1975): settings, characters, the initialing event, conflicts/goals, actions, and resolutions. The  
390 argumentative text includes the interlinked premiss-illative-conclusion argumentative structure  
391 (Hitchcock, 2007), with an overall conclusion at the beginning or end of the text. (4) Self-content. The  
392 narrative text should be a complete and independent story; the argumentative text should support a  
393 conclusion based on the points independent from the previous chapters. (5) Text length between 1000 to  
394 1300 words. We posited that a comfortable speed range for an Italian audiobook is between 165 and 170  
395 words per minute, which is slightly slower than the average speed of the *Radiotelevisione Italiana* (192.46  
396 words per minute) (Rodero, 2012). This criterion ensures the duration of the selected texts is relatively the  
397 same, which is about 6 to 8 minutes, comparable to the 7-minute one used in the studies employing ISC  
398 (Lerner et al., 2011) and ISFC (Simony et al., 2016) methods. In the end, we preselected seven such texts  
399 - three narrative and four argumentative.

400         Then, we recruited 35 native Italian speakers (who did not participate in the fMRI experiment; 11  
401 females; age range: 23 to 67, mean age: 32) to rate nine features of these seven texts on a five-point Likert  
402 scale. Each participant rated four texts; hence each text was rated by 20 participants. The nine features  
403 were difficulty, narrativeness, concreteness, scene construction, Self-projection, theory of mind,  
404 argumentativeness, abstractness, and logical thinking (see the questionnaire in the supplementary  
405 material). For each text, we also designed two questions on its content before the rating questions to  
406 indicate whether the participants had read and comprehended the texts (accuracy rate: 5/8 to 8/8, mean  
407 accuracy: 7/8). As all participants provided at least one correct response for each text, we did not exclude  
408 any data points. We discarded the texts with high ratings on difficulty (mean rating > 3) and chose two  
409 narrative texts and two argumentative texts as our stimuli by maximizing the difference between the  
410 ratings of these two text types: the narrative texts had higher ratings on narrative, concreteness, scene  
411 construction, and theory of mind; the argumentative texts had higher ratings on argumentativeness,

## NARRATIVE AND ARGUMENTATIVE THOUGHT

412 abstractness, and logical thinking (Fig. 1). The two selected narrative texts came from: *The wasp*  
413 *treatment* in the book *Marcovaldo* by Italo Calvino, who tells a story in which the protagonist asks his  
414 children to catch wasps and uses them to cure his neighbors' rheumatism (Narrative 1); *Kulala's four*  
415 *veils* in the book *The bar beneath the sea* by Stefano Benni, who tells a typical fairy tale (Narrative 2).  
416 The two selected argumentative texts were truncated from: *Counting happiness* in the book *Sapiens: a*  
417 *brief history of humankind* by Yuval Noah Harari, who discusses which are the most crucial factors  
418 leading to happiness (Argument 1); *An instinct to acquire an art* in the book *The language instinct: how*  
419 *the mind creates language* by Steven Pinker, who argues the nature of language is an instinct faculty, not  
420 a cultural product (Argument 2).

421         Next, we divided the selected four texts into segments. Each segment included one or more  
422 complete sentences, which ended with a period, question mark, exclamation mark, colon, or semi-colon,  
423 i.e., we did not divide the sentences into clauses. We matched the extent of fragmentation (i.e., the number  
424 of segments and the length of segments) between these two text types (Table 1). In the argumentative text,  
425 each segment consisted of only one complete sentence. As the sentences in narrative texts (mean  $\pm$  SD:  
426  $15 \pm 8$  words) were on average shorter than those in the argumentative texts (mean  $\pm$  SD:  $23 \pm 11$  words),  
427 in the narrative text, each segment might consist of more than one sentence.

428         After that, the same professional voice actor recorded all the four texts with relatively the same  
429 volume, speed, voice, and tone. We cut the audio clips according to the segments that we had divided.  
430 The duration of each segment was comparable to the duration of the sentence-scrambled version ( $7.7 \pm$   
431  $3.5$ s) used in the studies employing the ISC/ISFC method (Lerner et al., 2011; Simony et al., 2016) and  
432 matched between the two text types (Table 1). We sorted these segments according to a random order and  
433 concatenated them together to generate a sentence-scrambled version for each text.

## NARRATIVE AND ARGUMENTATIVE THOUGHT

434 Finally, we added the same 10s neutral music before both intact and scrambled versions of the  
435 stimuli following previous studies employing ISC (Lerner et al., 2011). The volume of the music tapered  
436 to zero before the audio texts started. As an abrupt beginning of the sound may elicit a global arousal  
437 response in the brain, a piece of opening music here helped to capture the participants' attention and to  
438 protect the start of the texts from being affected by such an arousal shift. We excluded the neural signal  
439 in this music period from the analysis (see fMRI preprocessing).

440

### 441 *Procedures*

442 Participants were told that they would be listening to the intact and the scrambled version of four texts  
443 during fMRI scanning. They were instructed to follow and comprehend the texts attentively and were  
444 informed that they would be asked to fill in a post-scanning questionnaire on the content of what they  
445 have heard. To avoid visual intrusion, we blindfolded the participants and turned off the light in the  
446 scanning room.

447 We presented the audio stimuli using Psychtoolbox-3 (<http://psychtoolbox.org/>). The sound was  
448 delivered through an in-ear headphone. Before the formal scanning, participants were instructed to check  
449 the sound in the headphone under the scanning noise. We adjusted the volume for each participant to  
450 ensure they could hear the pronunciation clearly but meanwhile did not feel too loud.

451 The functional scanning included nine runs, one for the eight-minute resting state, four for the  
452 sentence-scrambled version of the texts, and four for intact version of the texts. Each task runs presented  
453 one single text. To make sure the participants were unable to replay the stimuli in the resting state, we put  
454 the resting-state run before all the task runs. To make sure the participants were unable to construct  
455 coherent thought in the sentence-scrambled runs based on the intact texts they had already heard, we put  
456 the four sentence-scrambled runs before the runs for the intact texts. The order of the four sentence-

## NARRATIVE AND ARGUMENTATIVE THOUGHT

457 scrambled runs was randomized across participants. For the same participant, the intact-text runs followed  
458 the same order of their corresponding sentence-scrambled runs.

459 After the scanning, all participants completed a questionnaire on the content of the texts that they  
460 had heard during the scanning. We designed two questions for each of the four texts. In the same  
461 questionnaire, we also asked the participants to do the ratings that were used in the stimulus-selection  
462 stage. They were also asked to rate to which degree they could understand each text on a five-point Likert  
463 scale.

464

### 465 *MRI acquisition*

466 MRI data were acquired using a MAGNETOM Prisma 3T MR scanner (Siemens) with a 64-channel head–  
467 neck coil at the Centre for Mind/Brain Sciences, University of Trento. Functional images were acquired  
468 using the simultaneous multislices echoplanar imaging sequence, the scanning plane was parallel to the  
469 bicommissural plane, the phase encoding direction was from anterior to posterior, repetition time (TR) =  
470 1000 ms, echo time (TE) = 28 ms, flip angle (FA) = 59°, field of view (FOV) = 200 mm × 200 mm, matrix  
471 size = 100 × 100, 65 axial slices, slices thickness (ST) = 2 mm, gap = 0.2 mm, voxel size = 2 × 2 × (2 +  
472 0.2) mm, multiband factor = 5. Three-dimensional T1-weighted images were acquired using the  
473 magnetization-prepared rapid gradient-echo sequence, sagittal plane, TR = 2140 ms, TE = 2.9 ms,  
474 inversion time = 950 ms, FA = 12°, FOV = 288 mm × 288 mm, matrix size = 288 × 288, 208 continuous  
475 sagittal slices, ST = 1 mm, voxel size = 1 × 1 × 1 mm.

476

### 477 *MRI preprocessing*

478 We performed fMRI preprocessing using *fMRIPrep 1.5.0* (Esteban et al., 2019), which is based on *Nipype*  
479 *1.2.2* (Gorgolewski et al., 2011). Please see the section *MRI preprocessing using fMRIPrep 1.5.0* in the

## NARRATIVE AND ARGUMENTATIVE THOUGHT

480 supplementary material, where a boilerplate text directly generated by the *fMRIPrep* describes the  
481 preprocessing steps used in the current study. The first 10s, which was the music period in the task runs,  
482 was labeled as the dummy scans; thus, they were excluded from the analysis. As surface-based analysis  
483 can significantly improve the spatial localization compared to the traditional volume-based analysis  
484 (Coalson et al., 2018), we used the images in the *fsaverage5* surface space generated by *fMRIPrep*.

485 We excluded the non-neuronal signal sources through two steps (Pruim et al., 2015). First, we  
486 removed the motion-relevant noise using an Independent Component Analysis based strategy for  
487 Automatic Removal of Motion Artifacts (ICA-AROMA) (Pruim et al., 2015). The identified motion-  
488 relevant components and the signal components were fit into the same general linear model (GLM) to  
489 predict the BOLD signal in each vertex on the brain surface. We estimated the beta coefficients using  
490 the *fitglm* function in Matlab 2019a and subtracted the motion-relevant terms from the BOLD signal. In  
491 this way, the motion-relevant components were removed "non-aggressively" by preserving the shared  
492 variance between the motion-relevant components and the signal components. Then, we further removed  
493 the other nuisance variables like the mean timecourses in a conservative mask of the white matter (WM)  
494 and the cerebrospinal fluid (CSF), which were extracted by *fMRIPrep*. As a recent study demonstrate that  
495 the low-frequency component (0 - 0.01 Hz) makes a significant contribution to the ISC (Kauppi et al.,  
496 2010), we did not implement high-pass temporal filtering. Instead, we fitted the quadratic polynomial time  
497 trend together with the WM and the CSF timecourse into the same GLM to predict the timecourse resulting  
498 from the first step, aiming to remove the signal drift. In the same way, we estimated the beta coefficients  
499 and subtracted the WM, the CSF, and the quadratic polynomial terms from the signal.

500 We implemented the surface smoothing on the resulting images with a full width at half maximum  
501 of 8 mm using the *mri\_surf2surf* command in FreeSurfer (<http://surfer.nmr.mgh.harvard.edu/>). The  
502 timecourse in each vertex was then z-normalized across time points to enter the following analyses.

## NARRATIVE AND ARGUMENTATIVE THOUGHT

503

### 504 *Brain network identification*

505 We identified the brain systems based on a pre-labeled atlas (Thomas Yeo et al., 2011). The brain systems  
506 in this atlas are identified by applying the clustering analysis on the pattern of 1000 young healthy  
507 participant's resting-state functional connectivity (RSFC). The atlas has two versions: one coarse version  
508 with seven networks and one fine-resolution version with 17 networks. We chose the fine-resolution  
509 version as the start for two reasons. First, the fine-resolution version separates the dorsal somatosensory  
510 and motor cortex corresponding to the body parts mainly below the neck from the ventral networks  
511 consisting of the auditory cortex and the somatosensory and motor cortex corresponding to the body parts  
512 mainly up the neck. This division helps us to differentiate the auditory cortex from most of the  
513 somatosensory and motor areas. Second, the fine-resolution version also separates the language network  
514 (Fedorenko et al., 2011) and the DMN (Buckner et al., 2008). Previous studies suggest these two networks  
515 are dissociated in respective of both activation profile and functional connectivity pattern (Mineroff et al.,  
516 2018; Xu et al., 2017, 2016). We merged the Network 14 and Network 17 as the language network, which  
517 mainly includes the perisylvian cortex and the 55b area (Fedorenko et al., 2011; Glasser et al., 2016). We  
518 merged Network 15 and Network 16 as the DMN, as these two networks largely correspond to the two  
519 identified sub-networks of the DMN (Braga and Buckner, 2017). We preserved the labels used in the  
520 coarse version of the atlas for the other brain networks. These networks are visual; ventral  
521 attention (Corbetta and Shulman, 2002; Fox et al., 2006), which may implicate multiple networks variably  
522 referred to as the salience (Seeley et al., 2007) and the cingulo-opercular (Dosenbach et al., 2008); dorsal  
523 attention (Corbetta and Shulman, 2002; Fox et al., 2006); frontoparietal control (Dosenbach et al., 2008;  
524 Vincent et al., 2008); and limbic. In the end, we obtained an atlas, including nine brain systems  
525 (Supplementary Fig. 2a).

## NARRATIVE AND ARGUMENTATIVE THOUGHT

526

527 *ISC analysis*

528 The ISC was defined as the Pearson's correlation between the timecourse in the same area of different  
529 participants. We calculated the ISC for each vertex each run using a leave-one-participant-out approach.  
530 For each participant, we first averaged the timecourses of all the other participants and then correlated this  
531 mean timecourse with this participant's timecourse. The resulting Pearson's correlation coefficients (one  
532 per participant) were Fisher-z transformed using the inverse hyperbolic tangent function before they were  
533 averaged as one ISC index. In this way, we obtained one ISC surface map for each of the nine runs.

534 We contrasted the ISC surface maps between different conditions to obtain a veritable ISC contrast  
535 value for each vertex for each contrast. The major contrasts were: (1) Scrambled Narrative Contrast:  
536 (Scrambled Narrative 1 + Scrambled Narrative 2) - 2 × Rest; (2) Intact Narrative Contrast: (Intact  
537 Narrative 1 + Intact Narrative 2) - 2 × Rest; (3) Narrative Contrast: (Intact Narrative 1 - Scrambled  
538 Narrative 1) + (Intact Narrative 2 - Scrambled Narrative 2); (4) Scrambled Argumentative Contrast:  
539 (Scrambled Argument 1 + Scrambled Argument 2) - 2 × Rest; (5) Intact Argumentative Contrast: (Intact  
540 Argument 1 + Intact Argument 2) - 2 × Rest; (6) Argumentative Contrast: (Intact Argument 1 - Scrambled  
541 Argument 1) + (Intact Argument 2 - Scrambled Argument 2); (7) Narrative Specific Contrast: [(Intact  
542 Narrative 1 - Scrambled Narrative 1) + (Intact Narrative 2 - Scrambled Narrative 2)] - [(Intact Argument  
543 1 - Scrambled Argument 1) + (Intact Argument 2 - Scrambled Argument 2)]; (8) Argumentative Specific  
544 Contrast: [(Intact Argument 1 - Scrambled Argument 1) + (Intact Argument 2 - Scrambled Argument 2)]  
545 - [(Intact Narrative 1 - Scrambled Narrative 1) + (Intact Narrative 2 - Scrambled Narrative 2)]. We also  
546 implemented similar contrasts using individual narrative texts and individual argumentative texts to  
547 validate our results and to evaluate the inter-stimulus consistency. The following ISFC analysis used the  
548 same contrasts here.



## NARRATIVE AND ARGUMENTATIVE THOUGHT

549           The statistical likelihood of each contrast was assessed using the subject-wise bootstrapping  
550 method, where the exchangeability and independence assumptions are satisfied (G. Chen et al., 2016). In  
551 each bootstrapping iteration, the same number of participants were randomly resampled with replacement.  
552 The ISC was calculated between the timecourse of one participant and the mean timecourse of the other  
553 participants. Here, "the other participants" were those excluding him/herself and the repeated ones of  
554 him/herself due to resampling with replacement (Nili et al., 2014). The obtained Pearson's correlation  
555 coefficients (one per participant) were Fisher-Z transformed and averaged. We then contrasted these maps  
556 between conditions in the same way as before. This procedure was repeated 5000 times to form a sampling  
557 distribution for each contrast. The null distribution of each contrast was generated by subtracting the  
558 veritable contrast value from the sampling distribution, and the veritable contrast value was then ranked  
559 against the null distribution (Hall and Wilson, 1991). As the null distribution of each contrast of each  
560 vertex was symmetrical (the skewness is within  $\pm 1$ ), to provide a quantitative measure of the magnitude  
561 across contrasts and vertexes, we calculated the standardized effect size (SES) as  $(x - \mu)/\sigma$ , where  $x$  is  
562 the veritable contrast value,  $\mu$  is the mean of the null distribution, and  $\sigma$  is the standard deviation of the  
563 null distribution (Botta-Dukát, 2018). To obtain a high-resolution P-value given the limited number of  
564 resamples, we estimated the right-tail p-value of each contrast by approximating a generalized Pareto  
565 distribution to the tail of the null distribution (Knijnenburg et al., 2009). We corrected for multiple  
566 comparisons across the entire brain surface using the false-discovery rate (FDR) correction algorithm  
567 without the need for the assumption of independence across vertices (Benjamini and Yekutieli, 2001) ( $P$   
568  $< 0.05$ ).

569

570 *ISFC analysis*



## NARRATIVE AND ARGUMENTATIVE THOUGHT

571 The ISFC was defined as the Pearson's correlation between the timecourse in two discrete brain areas from  
572 different participants. We defined the brain areas based on the cortical parcellation derived by integrating  
573 the local gradient approach, which detects the abrupt transitions in RSFC patterns, and the global similarity  
574 approach, which clusters similar global ISFC patterns despite the spatial proximity (Schaefer et al., 2018).  
575 Thus, the obtained parcels are locally homogenous and globally match to the brain networks shown above  
576 (Thomas Yeo et al., 2011). We chose the template matched to the 17 brain networks and then relabeled  
577 them as nine networks of interest. Considering the trade-off between the spatial resolution and the  
578 computational load, we chose the cortical parcellation consisting of 200 parcels. The averaged the  
579 timecourses across all vertexes in each parcel was used as the timecourse of that parcel.

580 We calculated the pair-wised, inter-regional ISFC among the 200 parcels for each run using a  
581 leave-one-participant-out approach following the previous study (Simony et al., 2016). A 200 by 200 ISFC  
582 matrix  $C$  was obtained for each of the nine runs, where each element in the matrix (e.g.,  $C_{ij}$ ) represents  
583 the ISFC strength between each pair of regions (e.g., the  $i$ th and the  $j$ th brain areas). To calculate the value  
584 of  $C_{ij}$ , we first averaged the timecourses of all the other participants in the  $j$ th area and then correlated this  
585 mean timecourse with this participant's timecourse in the  $i$ th area. The resulting Pearson's correlation  
586 coefficients (one per participant) were then Fisher-z transformed, averaged, and assigned to  $C_{ij}$ . Note that  
587 the  $C_{ji}$  is not necessarily equal to  $C_{ij}$ . To make the ISFC measure unidirectional, we symmetrized the ISFC  
588 matrix as  $(C + C^T) / 2$ , where  $C^T$  is the transpose of the matrix  $C$ . We contrasted the ISFC matrix  
589 between different conditions using the same contrasts in the ISC analysis to obtain a veritable contrast  
590 value for each pair of brain areas for each contrast.

591 The statistical likelihood of each contrast was assessed using a similar subject-wise bootstrapping  
592 method shown in the ISC analysis. In each iteration of the bootstrapping, the same number of participants  
593 were randomly resampled with replacement. A 200 by 200 ISFC matrix  $C$  was calculated using the data

## NARRATIVE AND ARGUMENTATIVE THOUGHT

594 from this sample, where each element in the matrix (e.g.,  $C_{ij}$ ) represents the ISFC strength between each  
595 pair of brain areas (e.g., the  $i$ th and the  $j$ th brain areas).  $C_{ij}$  was calculated as Pearson's correlation  
596 coefficient between the timecourse in the  $i$ th brain area of one participant and the mean timecourse in the  
597  $j$ th brain area of the other participants. Here, "the other participants" were those excluding him/herself and  
598 the repeated ones of him/herself due to resampling with replacement (Nili et al., 2014). The obtained  
599 Pearson's correlation coefficients (one per participant) were Fisher-Z transformed, averaged, and assigned  
600 to  $C_{ij}$ . We symmetrized the ISFC Matrix  $C$  in the same way as before. We contrasted these final ISFC  
601 matrixes between conditions, ending this iteration. This procedure was repeated 5000 times to form a  
602 sampling distribution of ISFC contrast value for each pair of brain areas for each contrast. The null  
603 distribution of each contrast was generated by subtracting the veritable contrast value from the sampling  
604 distribution (Hall and Wilson, 1991). As the null distribution of each contrast of each pair of brain regions  
605 was symmetrical (the skewness is within  $\pm 1$ ), to provide a quantitative measure of the magnitude across  
606 contrasts and pairs of brain regions, we calculated the SES as  $(x - \mu)/\sigma$ , where  $x$  is the veritable contrast  
607 value,  $\mu$  is the mean of the null distribution, and  $\sigma$  is the standard deviation of the null distribution (Botta-  
608 Dukát, 2018). We controlled the family-wise error (FWE) rate by defining the threshold at the 5%  
609 percentile of the null distribution of the maximum across all pairs of brain areas and thresholded the SES  
610 matrix by assigning the insignificant brain pairs to zero.

611 The resulting thresholded SES adjacency matrix in each contrast was modeled as a weighted graph  
612 comprising nodes and edges (Fornito et al., 2016); the nodes represent brain areas, and the edges represent  
613 the SES of that contrast for the ISFC between each pair of the brain areas. We used the node degree to  
614 measure the importance of one brain area in each contrast. The degree of node  $i$  was calculated as  $\sum_{j=1}^{200} C_{ij}$ ,  
615 where  $C$  was the thresholded SES adjacency matrix.

616

## NARRATIVE AND ARGUMENTATIVE THOUGHT

### 617 *Visualization*

618 The ISC results were illustrated using the Connectome Workbench 1.3.2  
619 (<https://www.humanconnectome.org/software/connectome-workbench>). For the visualization purpose,  
620 we mapped the significant clusters from the fsaverage5 surface to the fsLR surface using the  
621 ADAP\_BARY\_AREA method. We excluded the clusters that are smaller than 200 mm<sup>2</sup>. The significant  
622 clusters were illustrated on an inflate surface against the group-averaged sulcus image of 1096 young  
623 adults from the dataset under the Human Connectome Project (<https://balsa.wustl.edu/reference/pkXDZ>).  
624 For the ISFC results, the network layout was generated using the force-directed graph drawing algorithm  
625 (Fruchterman and Reingold, 1991) with NodeXL (<https://www.smrfoundation.org/nodexl/>)(Smith et al.,  
626 2010). The brain networks were visualized with the BrainNet Viewer (<https://www.nitrc.org/projects/bnv/>)  
627 (Xia et al., 2013). To localize each node, we used the centroid of the Montreal Neurological Institute  
628 coordinates of each brain parcel in the volume version of the same brain parcellation atlas.

## NARRATIVE AND ARGUMENTATIVE THOUGHT

### 629 Reference

- 630 Beach LR, Bissel BL. 2016. Narrative thought A New Theory of Mind : The Thoery of Narrative  
631 Thought. Cambridge Scholars Publishing.
- 632 Benjamini Y, Yekutieli D. 2001. The control of the false discovery rate in multiple testing under  
633 dependency. *Ann Stat*. doi:10.1214/aos/1013699998
- 634 Bishop SJ, Fossella J, Croucher CJ, Duncan J. 2008. COMT val158met genotype affects recruitment of  
635 neural mechanisms supporting fluid intelligence. *Cereb Cortex* **18**:2132–2140.  
636 doi:10.1093/cercor/bhm240
- 637 Blair JA. 2015. What is informal logic? Reflections on Theoretical Issues in Argumentation Theory.  
638 Springer. pp. 27–42.
- 639 Botta-Dukát Z. 2018. Cautionary note on calculating standardized effect size (SES) in randomization  
640 test. *Community Ecol*. doi:10.1556/168.2018.19.1.8
- 641 Braga RM, Buckner RL. 2017. Parallel Interdigitated Distributed Networks within the Individual  
642 Estimated by Intrinsic Functional Connectivity. *Neuron*. doi:10.1016/j.neuron.2017.06.038
- 643 Bruner J. 1986. Two modes of thought Actual Minds, Possible Worlds. Harvard University Press  
644 Cambridge MA. pp. 11–43.
- 645 Buckner RL, Andrews-Hanna JR, Schacter DL. 2008. The brain’s default network: Anatomy, function,  
646 and relevance to disease. *Ann N Y Acad Sci* **1124**:1–38. doi:10.1196/annals.1440.011
- 647 Buckner RL, Carroll DC. 2007. Self-projection and the brain. *Trends Cogn Sci* **11**:49–57.  
648 doi:10.1016/j.tics.2006.11.004
- 649 Chen G, Shin YW, Taylor PA, Glen DR, Reynolds RC, Israel RB, Cox RW. 2016. Untangling the  
650 relatedness among correlations, part I: Nonparametric approaches to inter-subject correlation  
651 analysis at the group level. *Neuroimage*. doi:10.1016/j.neuroimage.2016.05.023

## NARRATIVE AND ARGUMENTATIVE THOUGHT

- 652 Chen J, Honey CJ, Simony E, Arcaro MJ, Norman KA, Hasson U. 2016. Accessing Real-Life Episodic  
653 Information from Minutes versus Hours Earlier Modulates Hippocampal and High-Order Cortical  
654 Dynamics. *Cereb Cortex*. doi:10.1093/cercor/bhv155
- 655 Coalson TS, Van Essen DC, Glasser MF. 2018. The impact of traditional neuroimaging methods on the  
656 spatial localization of cortical areas. *Proc Natl Acad Sci U S A*. doi:10.1073/pnas.1801582115
- 657 Cole MW, Reynolds JR, Power JD, Repovs G, Anticevic A, Braver TS. 2013. Multi-task connectivity  
658 reveals flexible hubs for adaptive task control. *Nat Neurosci*. doi:10.1038/nn.3470
- 659 Corbetta M, Shulman GL. 2002. Control of goal-directed and stimulus-driven attention in the brain. *Nat*  
660 *Rev Neurosci* **3**:201–215. doi:10.1038/nrn755
- 661 Dosenbach NUF, Fair DA, Cohen AL, Schlaggar BL, Petersen SE. 2008. A dual-networks architecture  
662 of top-down control. *Trends Cogn Sci* **12**:99–105. doi:10.1016/j.tics.2008.01.001
- 663 Duncan J. 2010. The multiple-demand (MD) system of the primate brain: mental programs for  
664 intelligent behaviour. *Trends Cogn Sci* **14**:172–179. doi:10.1016/j.tics.2010.01.004
- 665 Esteban O, Markiewicz CJ, Blair RW, Moodie CA, Isik AI, Erramuzpe A, Kent JD, Goncalves M,  
666 DuPre E, Snyder M, Oya H, Ghosh SS, Wright J, Durnez J, Poldrack RA, Gorgolewski KJ. 2019.  
667 fMRIPrep: a robust preprocessing pipeline for functional MRI. *Nat Methods*. doi:10.1038/s41592-  
668 018-0235-4
- 669 Fedorenko E, Behr MK, Kanwisher N. 2011. Functional specificity for high-level linguistic processing  
670 in the human brain. *Proc Natl Acad Sci U S A*. doi:10.1073/pnas.1112937108
- 671 Fedorenko E, Duncan J, Kanwisher N. 2013. Broad domain generality in focal regions of frontal and  
672 parietal cortex. *Proc Natl Acad Sci U S A* **110**:16616–16621. doi:10.1073/pnas.1315235110
- 673 Ferstl EC, Neumann J, Bogler C, Von Cramon DY. 2008. The extended language network: A meta-  
674 analysis of neuroimaging studies on text comprehension. *Hum Brain Mapp*.

## NARRATIVE AND ARGUMENTATIVE THOUGHT

- 675       doi:10.1002/hbm.20422
- 676   Fornito A, Zalesky A, Bullmore ET. 2016. Fundamentals of Brain Network Analysis, Fundamentals of  
677       Brain Network Analysis. doi:10.1016/C2012-0-06036-X
- 678   Fox MD, Corbetta M, Snyder AZ, Vincent JL, Raichle ME. 2006. Spontaneous neuronal activity  
679       distinguishes human dorsal and ventral attention systems. *Proc Natl Acad Sci U S A*.  
680       doi:10.1073/pnas.0604187103
- 681   Fruchterman TMJ, Reingold EM. 1991. Graph drawing by force-directed placement. *Softw Pract Exp*.  
682       doi:10.1002/spe.4380211102
- 683   Glasser MF, Coalson TS, Robinson EC, Hacker CD, Harwell J, Yacoub E, Ugurbil K, Andersson J,  
684       Beckmann CF, Jenkinson M, Smith SM, Van Essen DC. 2016. A multi-modal parcellation of  
685       human cerebral cortex. *Nature*. doi:10.1038/nature18933
- 686   Gorgolewski K, Burns CD, Madison C, Clark D, Halchenko YO, Waskom ML, Ghosh SS. 2011.  
687       Nipype: A flexible, lightweight and extensible neuroimaging data processing framework in Python.  
688       *Front Neuroinform*. doi:10.3389/fninf.2011.00013
- 689   Graesser AC, Hautt-Smith K, Cohen AD, Pyles LD. 1980. Advanced outlines, familiarity, and text  
690       genre on retention of prose. *J Exp Educ*. doi:10.1080/00220973.1980.11011745
- 691   Hall P, Wilson SR. 1991. Two Guidelines for Bootstrap Hypothesis Testing. *Biometrics*.  
692       doi:10.2307/2532163
- 693   Hassabis D, Maguire EA. 2007. Deconstructing episodic memory with construction. *Trends Cogn Sci*  
694       11:299–306. doi:10.1016/j.tics.2007.05.001
- 695   Hasson U, Chen J, Honey CJ. 2015. Hierarchical process memory: Memory as an integral component of  
696       information processing. *Trends Cogn Sci*. doi:10.1016/j.tics.2015.04.006
- 697   Hitchcock D. 2007. Informal Logic and the Concept of ArgumentPhilosophy of Logic.

## NARRATIVE AND ARGUMENTATIVE THOUGHT

- 698       doi:10.1016/B978-044451541-4/50007-5
- 699   Hobbes T. 1651. The First Part: Of Man, Chapter III: Of the Consequence or Train of  
700       Imagination Leviathan.
- 701   Jacoby N, Fedorenko E. 2018. Discourse-level comprehension engages medial frontal Theory of Mind  
702       brain regions even for expository texts. *Lang Cogn Neurosci*. doi:10.1080/23273798.2018.1525494
- 703   James W. 1983. Essays in psychology. Harvard University Press.
- 704   Kauppi JP, Jääskeläinen IP, Sams M, Tohka J. 2010. Inter-subject correlation of brain hemodynamic  
705       responses during watching a movie: Localization in space and frequency. *Front Neuroinform*.  
706       doi:10.3389/fninf.2010.00005
- 707   Kemmerer D. 2014. Discourse Cognitive Neuroscience of Language. Psychology Press.
- 708   Knijnenburg TA, Wessels LFA, Reinders MJT, Shmulevich I. 2009. Fewer permutations, more accurate  
709       P-values *Bioinformatics*. doi:10.1093/bioinformatics/btp211
- 710   Lerner Y, Honey CJ, Silbert LJ, Hasson U. 2011. Topographic mapping of a hierarchy of temporal  
711       receptive windows using a narrated story. *J Neurosci*. doi:10.1523/JNEUROSCI.3684-10.2011
- 712   Lin N, Yang X, Li J, Wang S, Hua H, Ma Y, Li X. 2018. Neural correlates of three cognitive processes  
713       involved in theory of mind and discourse comprehension. *Cogn Affect Behav Neurosci*.  
714       doi:10.3758/s13415-018-0568-6
- 715   MacDonald AW, Cohen JD, Andrew Stenger V, Carter CS. 2000. Dissociating the role of the  
716       dorsolateral prefrontal and anterior cingulate cortex in cognitive control. *Science (80- )*.  
717       doi:10.1126/science.288.5472.1835
- 718   Mar RA. 2004. The neuropsychology of narrative: Story comprehension, story production and their  
719       interrelation. *Neuropsychologia*. doi:10.1016/j.neuropsychologia.2003.12.016
- 720   Margulies DS, Ghosh SS, Goulas A, Falkiewicz M, Huntenburg JM, Langs G, Bezgin G, Eickhoff SB,

## NARRATIVE AND ARGUMENTATIVE THOUGHT

- 721 Castellanos FX, Petrides M, Jefferies E, Smallwood J. 2016. Situating the default-mode network  
722 along a principal gradient of macroscale cortical organization. *Proc Natl Acad Sci U S A*  
723 **113**:12574–12579. doi:10.1073/pnas.1608282113
- 724 Mineroff Z, Blank IA, Mahowald K, Fedorenko E. 2018. A robust dissociation among the language,  
725 multiple demand, and default mode networks: Evidence from inter-region correlations in effect  
726 size. *Neuropsychologia*. doi:10.1016/j.neuropsychologia.2018.09.011
- 727 Nastase SA, Gazzola V, Hasson U, Keysers C. 2019. Measuring shared responses across subjects using  
728 intersubject correlation. *Soc Cogn Affect Neurosci*. doi:10.1093/scan/nsz037
- 729 Nili H, Wingfield C, Walther A, Su L, Marslen-Wilson W, Kriegeskorte N. 2014. A Toolbox for  
730 Representational Similarity Analysis. *PLoS Comput Biol* **10**. doi:10.1371/journal.pcbi.1003553
- 731 Oldfield RC. 1971. The assessment and analysis of handedness: The Edinburgh inventory.  
732 *Neuropsychologia*. doi:10.1016/0028-3932(71)90067-4
- 733 Park HJ, Friston K. 2013. Structural and functional brain networks: From connections to cognition.  
734 *Science (80- )* **342**. doi:10.1126/science.1238411
- 735 Petrides M. 1999. Dorsolateral prefrontal cortex: Comparative cytoarchitectonic analysis in the human  
736 and the macaque brain and corticocortical connection patterns. *Eur J Neurosci*. doi:10.1046/j.1460-  
737 9568.1999.00518.x
- 738 Power JD, Cohen AL, Nelson SM, Wig GS, Barnes KA, Church JA, Vogel AC, Laumann TO, Miezin  
739 FM, Schlaggar BL, Petersen SE. 2011. Functional Network Organization of the Human Brain.  
740 *Neuron* **72**:665–678. doi:10.1016/j.neuron.2011.09.006
- 741 Power JD, Mitra A, Laumann TO, Snyder AZ, Schlaggar BL, Petersen SE. 2014. Methods to detect,  
742 characterize, and remove motion artifact in resting state fMRI. *Neuroimage*.  
743 doi:10.1016/j.neuroimage.2013.08.048



## NARRATIVE AND ARGUMENTATIVE THOUGHT

- 744 Pruijm RHR, Mennes M, van Rooij D, Llera A, Buitelaar JK, Beckmann CF. 2015. ICA-AROMA: A  
745 robust ICA-based strategy for removing motion artifacts from fMRI data. *Neuroimage*.  
746 doi:10.1016/j.neuroimage.2015.02.064
- 747 Rodero E. 2012. A comparative analysis of speech rate and perception in radio bulletins. *Text Talk*.  
748 doi:10.1515/text-2012-0019
- 749 Rumelhart DE. 1975. Notes on a schema for stories,” in *Representation and Understanding: Studies in*  
750 *Cognitive Science*, eds DG Bobrow and A. Collins.
- 751 Schacter DL, Addis DR, Buckner RL. 2007. Remembering the past to imagine the future: The  
752 prospective brain. *Nat Rev Neurosci*. doi:10.1038/nrn2213
- 753 Schaefer A, Kong R, Gordon EM, Laumann TO, Zuo X-N, Holmes AJ, Eickhoff SB, Yeo BTT. 2018.  
754 Local-Global Parcellation of the Human Cerebral Cortex from Intrinsic Functional Connectivity  
755 MRI. *Cereb Cortex*. doi:10.1093/cercor/bhx179
- 756 Seeley WW, Menon V, Schatzberg AF, Keller J, Glover GH, Kenna H, Reiss AL, Greicius MD. 2007.  
757 Dissociable intrinsic connectivity networks for salience processing and executive control. *J*  
758 *Neurosci*. doi:10.1523/JNEUROSCI.5587-06.2007
- 759 Sepulcre J, Sabuncu MR, Yeo TB, Liu H, Johnson KA. 2012. Stepwise Connectivity of the Modal  
760 Cortex Reveals the Multimodal Organization of the Human Brain. *J Neurosci* **32**:10649–10661.  
761 doi:10.1523/JNEUROSCI.0759-12.2012
- 762 Simony E, Honey CJ, Chen J, Lositsky O, Yeshurun Y, Wiesel A, Hasson U. 2016. Dynamic  
763 reconfiguration of the default mode network during narrative comprehension. *Nat Commun*.  
764 doi:10.1038/ncomms12141
- 765 Smith M, Milic-Frayling N, Shneiderman B, Mendes Rodrigues E, Leskovec J, Dunne C. 2010.  
766 NodeXL: a free and open network overview, discovery and exploration add-in for Excel

## NARRATIVE AND ARGUMENTATIVE THOUGHT

- 767 2007/2010.
- 768 Spreng RN, Mar RA, Kim ASN. 2009. The common neural basis of autobiographical memory,  
769 prospection, navigation, theory of mind, and the default mode: A quantitative meta-analysis. *J*  
770 *Cogn Neurosci* **21**:489–510. doi:10.1162/jocn.2008.21029
- 771 Thomas Yeo BT, Krienen FM, Sepulcre J, Sabuncu MR, Lashkari D, Hollinshead M, Roffman JL,  
772 Smoller JW, Zöllei L, Polimeni JR, Fisch B, Liu H, Buckner RL. 2011. The organization of the  
773 human cerebral cortex estimated by intrinsic functional connectivity. *J Neurophysiol*.  
774 doi:10.1152/jn.00338.2011
- 775 Vincent JL, Kahn I, Snyder AZ, Raichle ME, Buckner RL. 2008. Evidence for a Frontoparietal Control  
776 System Revealed by Intrinsic Functional Connectivity. *J Neurophysiol* **100**:3328–3342.  
777 doi:10.1152/jn.90355.2008
- 778 Xia M, Wang J, He Y. 2013. BrainNet Viewer: A Network Visualization Tool for Human Brain  
779 Connectomics. *PLoS One*. doi:10.1371/journal.pone.0068910
- 780 Xu Y, He Y, Bi Y. 2017. A tri-network model of human semantic processing. *Front Psychol*.  
781 doi:10.3389/fpsyg.2017.01538
- 782 Xu Y, Lin Q, Han Z, He Y, Bi Y. 2016. Intrinsic functional network architecture of human semantic  
783 processing: Modules and hubs. *Neuroimage*. doi:10.1016/j.neuroimage.2016.03.004
- 784 Zabrocky KM, Moore DW. 1999. Influence of text genre on adults' monitoring of understanding and  
785 recall. *Educ Gerontol*. doi:10.1080/036012799267440
- 786 Zwaan RA, Radvansky GA. 1998. Situation Models in Language Comprehension and Memory. *Psychol*  
787 *Bull*. doi:10.1037/0033-2909.123.2.162
- 788

## NARRATIVE AND ARGUMENTATIVE THOUGHT

### 789 **Acknowledgements**

790 We thank Alessia Zampieri for the help in stimuli selection and Anna D'Urso for the help in data collection.

791 This research is supported by the Research Projects of National Interest (PRIN) grant from the Italian

792 Ministry of Education, University and Research (MIUR) to D.C. and O.C. (project number:

793 2015PCNJ5F\_001).

794

### 795 **Author contributions**

796 X.Y. and R.B. conceived the experiment. X.Y. and L.V. analyzed the data. X.Y. wrote the paper with

797 input from L.V., O.C., D.C., and R.B. All authors discussed the results and contributed to the paper.

798

### 799 **Competing interests**

800 The authors declare no competing interests.

## NARRATIVE AND ARGUMENTATIVE THOUGHT

**Table 1. Information on Selected Texts**

|                       |                           | Narrative Texts |                         | Argumentative Texts |                       |
|-----------------------|---------------------------|-----------------|-------------------------|---------------------|-----------------------|
|                       |                           | Narrative 1     | Narrative 2             | Argument 1          | Argument 2            |
| Quoted from Book      |                           | Marcovaldo      | The bar beneath the sea | Sapiens             | The language instinct |
| Texts                 | N. Words                  | 1335            | 1158                    | 1283                | 1183                  |
|                       | Duration (s)              | 458             | 402                     | 464                 | 431                   |
| Segments <sup>a</sup> | N. Segments               | 58              | 50                      | 54                  | 52                    |
|                       | N. Words <sup>b</sup>     | 23 ± 12         | 23 ± 10                 | 24 ± 12             | 23 ± 11               |
|                       | Duration (s) <sup>b</sup> | 7.9 ± 4.1       | 8.0 ± 3.4               | 8.6 ± 4.3           | 8.3 ± 4.1             |

<sup>a</sup> Each segment included one or more complete sentences, which ended with a period, question mark, exclamation mark, colon, or semi-colon. In the argumentative texts, each segment included one sentence. As the sentences in the narrative texts (mean ± SD: 15 ± 8 words) were on average longer than those in the argumentative texts (mean ± SD: 23 ± 11 words), in the narrative texts, each segment might include one more sentence.

<sup>b</sup> mean ± standard deviation

## NARRATIVE AND ARGUMENTATIVE THOUGHT

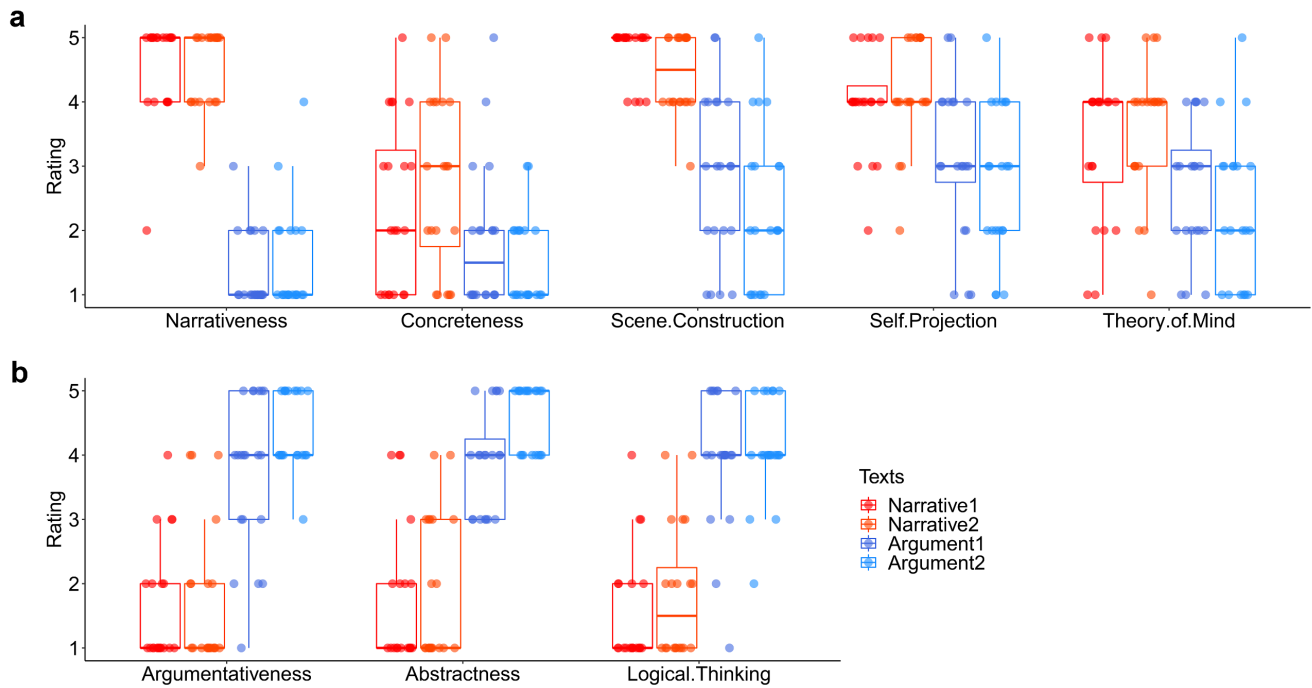

**Figure 1. Behavior rating on the four selected texts.** The boxplots show the rating scores on the four chosen texts from an independent group of participants who did not participate in the fMRI experiment. Each text was rated by 20 participants. Figure 1a shows the rating scores on the narrative texts were significantly higher than the argumentative texts on the items of narrativeness, concreteness, scene construction, self-projection, and theory of mind. Figure 1b shows the rating scores on argumentative texts were significantly higher than the narrative texts on the items of argumentativeness, abstractness, and logical thinking. The participants who participated in the fMRI experiment did the same rating. The results validated the rating pattern here, as shown in Supplementary Figure 1.

## NARRATIVE AND ARGUMENTATIVE THOUGHT

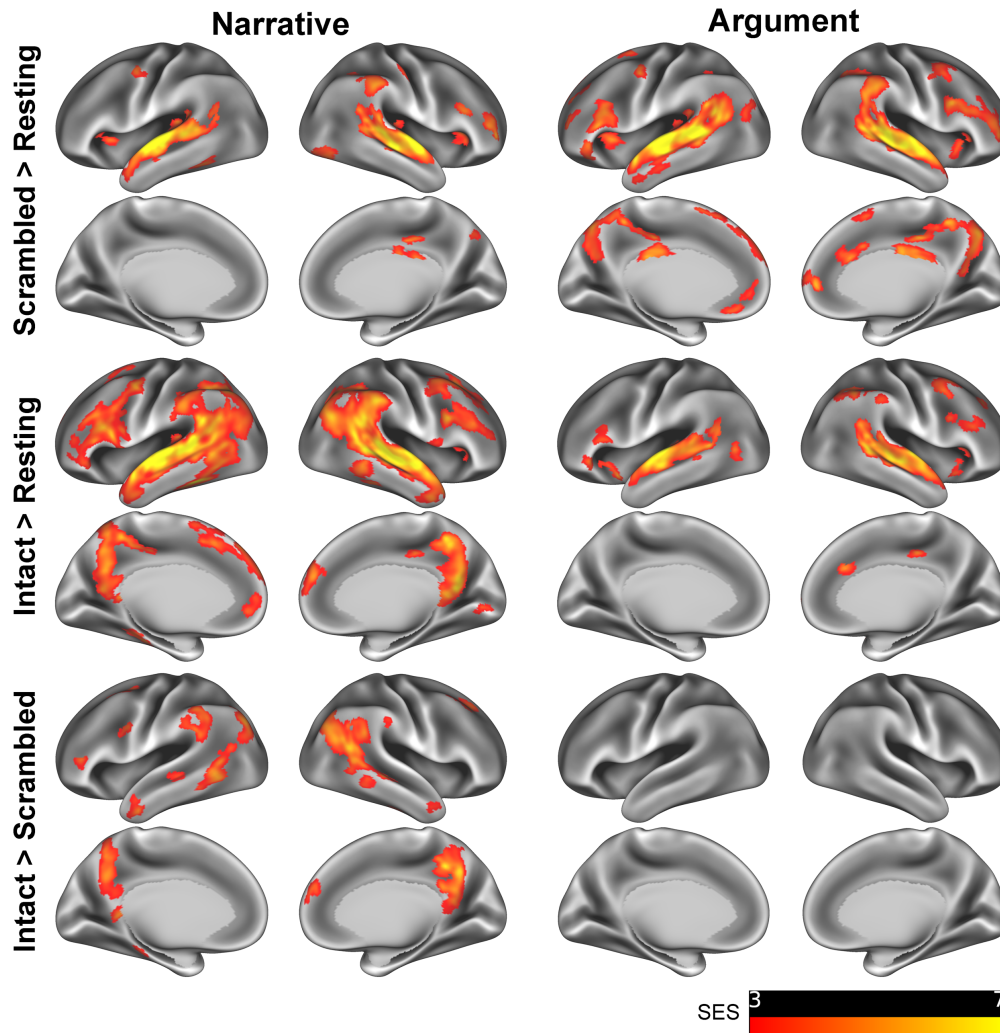

**Figure 2.** ISC revealed the narrative-induced activity in DMN but not the argumentative one. ISC contrast maps illustrate the significant areas of each contrast in the narrative (left) and the argumentative (right) conditions ( $P < 0.05$ , FDR corrected, Area  $> 200 \text{ mm}^2$ ). The first row shows the results in the contrast between the scrambled-sentence conditions and the resting state. For both narrative and argumentative conditions, mainly the auditory system, the language system, and the domain-general system are involved. The second row shows the results of the contrast between the intact-text conditions and the resting state. While the neural distribution in the intact-narrative condition extended to other brain systems like the DMN, the neural distribution in the intact-argumentative condition was confined to the areas in the scrambled-argumentative condition. The third row shows the results of the direct contrast between the intact-text condition and the scrambled-sentence condition. Areas in the default mode, language, control, and attention systems were more engaged in the intact narratives. We did not find any significant areas in this contrast for the argumentative condition. SES: standard effect size.

## NARRATIVE AND ARGUMENTATIVE THOUGHT

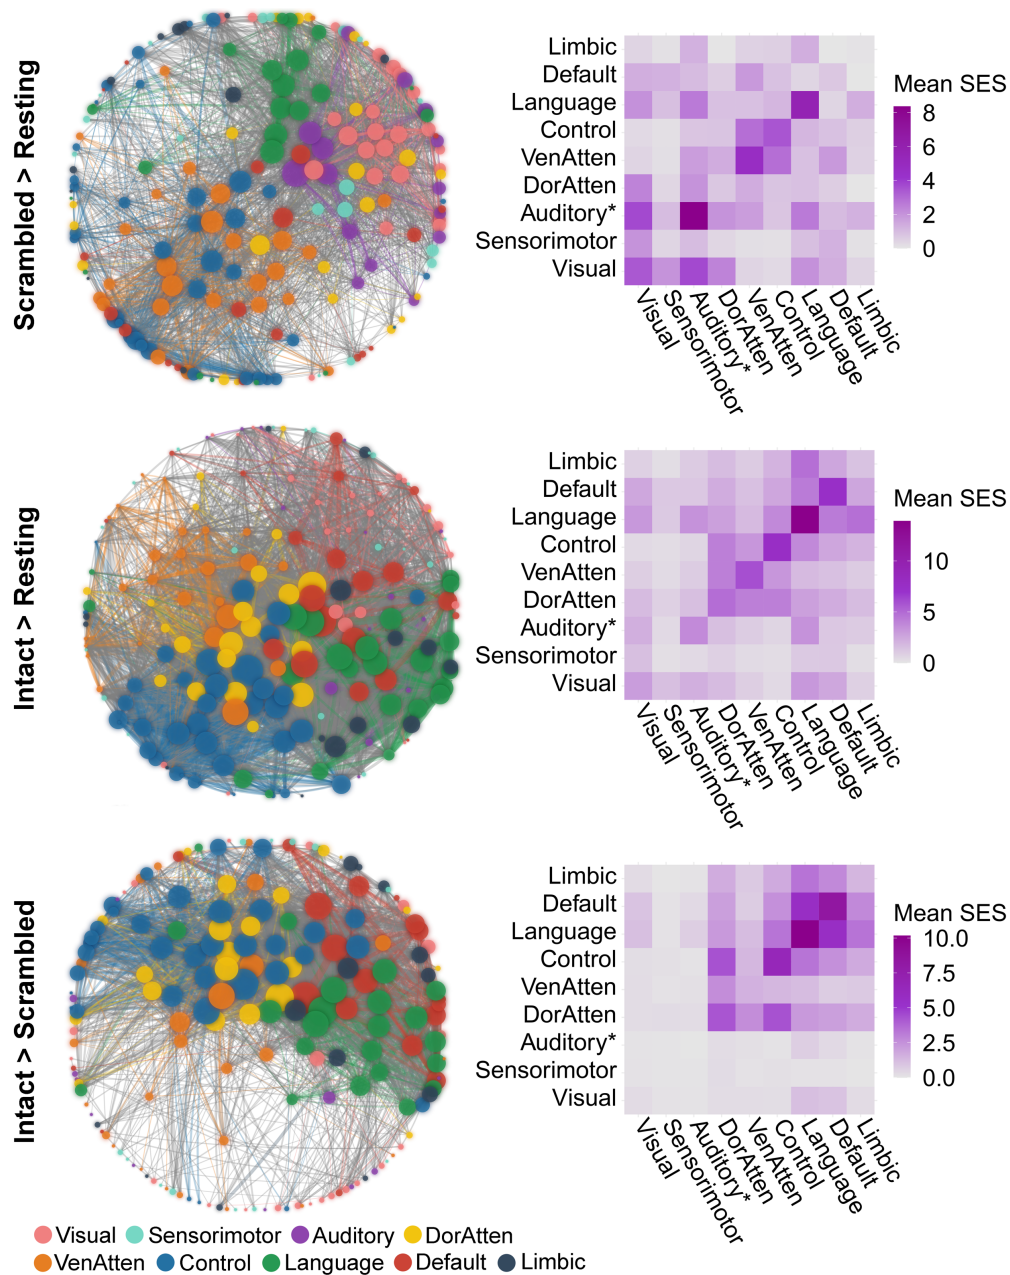

**Figure 3. Network reconfiguration for narrative comprehension.** The figure illustrates the significant ISFC difference ( $P < 0.05$ , FWE corrected) between the scrambled-narrative condition and the resting state (the first row), the intact-narrative condition and the resting state (the second row), and the intact- and scrambled-narrative condition (the third row). The left column shows the network layout, where the nodes represent the brain areas, and the edges represent the significant interregional ISFC differences between conditions. This layout was generated using the force-directed graph drawing algorithm: strongly connected nodes cluster together, and weakly connected nodes are pushed apart. The size of the nodes denotes the node degree of each brain area. The color of the nodes denotes to which brain system they belong. The width of the edges denotes the standardized effect size (SES). Intra-system edges are in the color of that network; inter-system edges are in gray. The right column shows the distribution of all the significant edges of each contrast within or between brain systems. Each cell indicates the mean SES of each contrast, i.e., the ratio between the sum of the SES and the number of the edges in the fully connected situation. "Auditory\*" denotes the network including not only the auditory cortex but also the ventral somatosensory and motor brain areas corresponding to the body parts above the neck. VenAtten = Ventral Attention; DorAtten = Dorsal Attention.



## NARRATIVE AND ARGUMENTATIVE THOUGHT

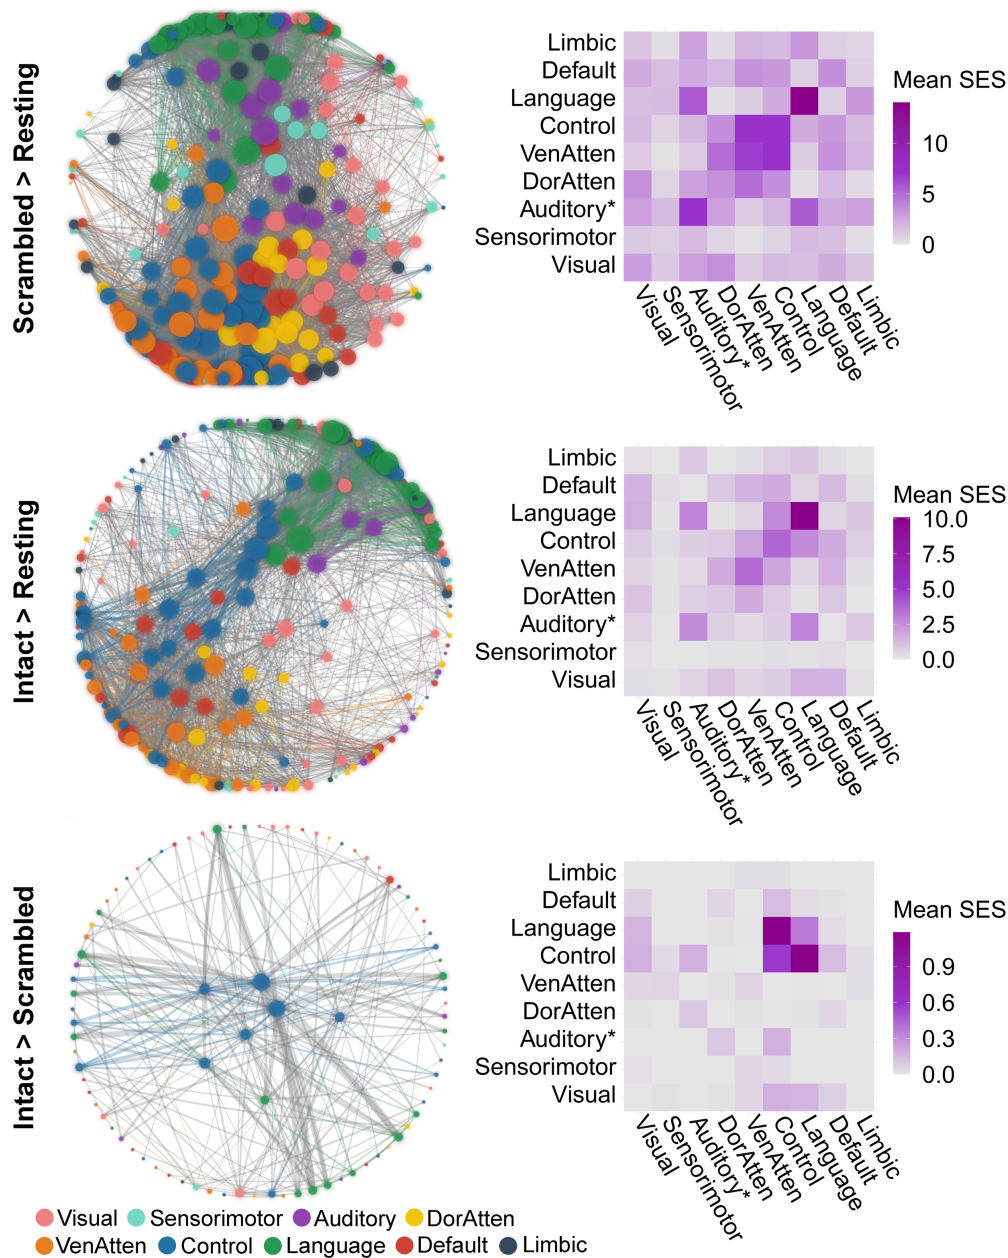

**Figure 4. Network reconfiguration for argumentative comprehension.** The figure illustrates the significant ISFC difference ( $P < 0.05$ , FWE corrected) between the scrambled-argumentative condition and the resting state (the first row), the intact-argumentative condition and the resting state (the second row), and the intact- and scrambled-argumentative conditions (the third row). The left column shows the network layout, where the nodes represent the brain areas, and the edges represent the significant inter-regional ISFC differences between conditions. This layout was generated using the force-directed graph drawing algorithm: strongly connected nodes cluster together, and weakly connected nodes are pushed apart. The size of the nodes denotes the node degree of each brain area. The color of the nodes denotes to which brain system they belong. The width of the edges denotes the standardized effect size (SES). Intra-system edges are in the color of that network; inter-system edges are in gray. The right column shows the distribution of all the significant edges of each contrast within or between brain systems. Each cell indicates the mean SES of each contrast, i.e., the ratio between the sum of the SES and the number of the edges in the fully connected situation. "Auditory\*" denotes the network including not only the auditory cortex but also the ventral somatosensory and motor brain areas corresponding to the body parts above the neck. VenAtten = Ventral Attention; DorAtten = Dorsal Attention.



## NARRATIVE AND ARGUMENTATIVE THOUGHT

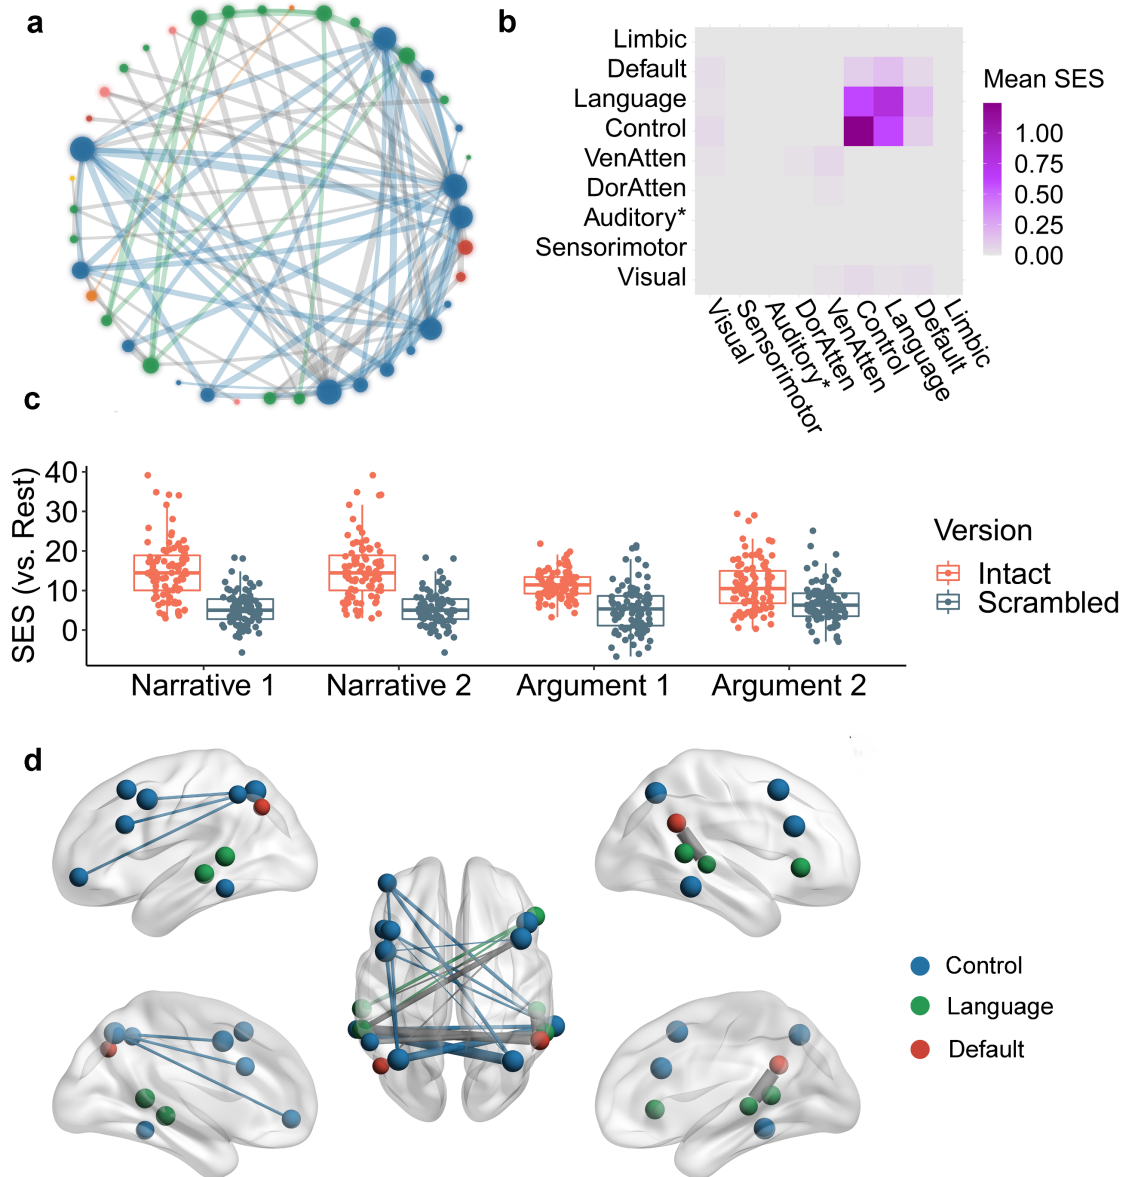

**Figure 5. The shared network for both narrative and argumentative thought.** Figure a illustrates the network layout of the shared brain network for narrative and argumentative thought using the force-directed graph drawing algorithm. It consisted of 88 edges. The color legend is the same as the one in Figure 3 and Figure 4. Figure b illustrates the distribution of 88 edges within and between brain systems, where each cell indicates the mean standardized effect size (SES) in the contrast between the narrative and the scrambled conditions, i.e., the ratio between the sum of the SES and the number of the edges in the fully connected situation. Figure c illustrates the SES of the 88 edges of all the conditions in contrast to the resting state. Figure d illustrates the top 20 edges with the largest SES in the contrast between narrative and scrambled conditions. In Figure a and Figure d, the size of the nodes denotes the node degree of each brain area in the whole graph comprising 88 edges. The color of the nodes denotes to which brain system they belong. The width of the edges denotes the SES. Intra-system edges are in the color of that network; inter-system edges are in gray.

## NARRATIVE AND ARGUMENTATIVE THOUGHT

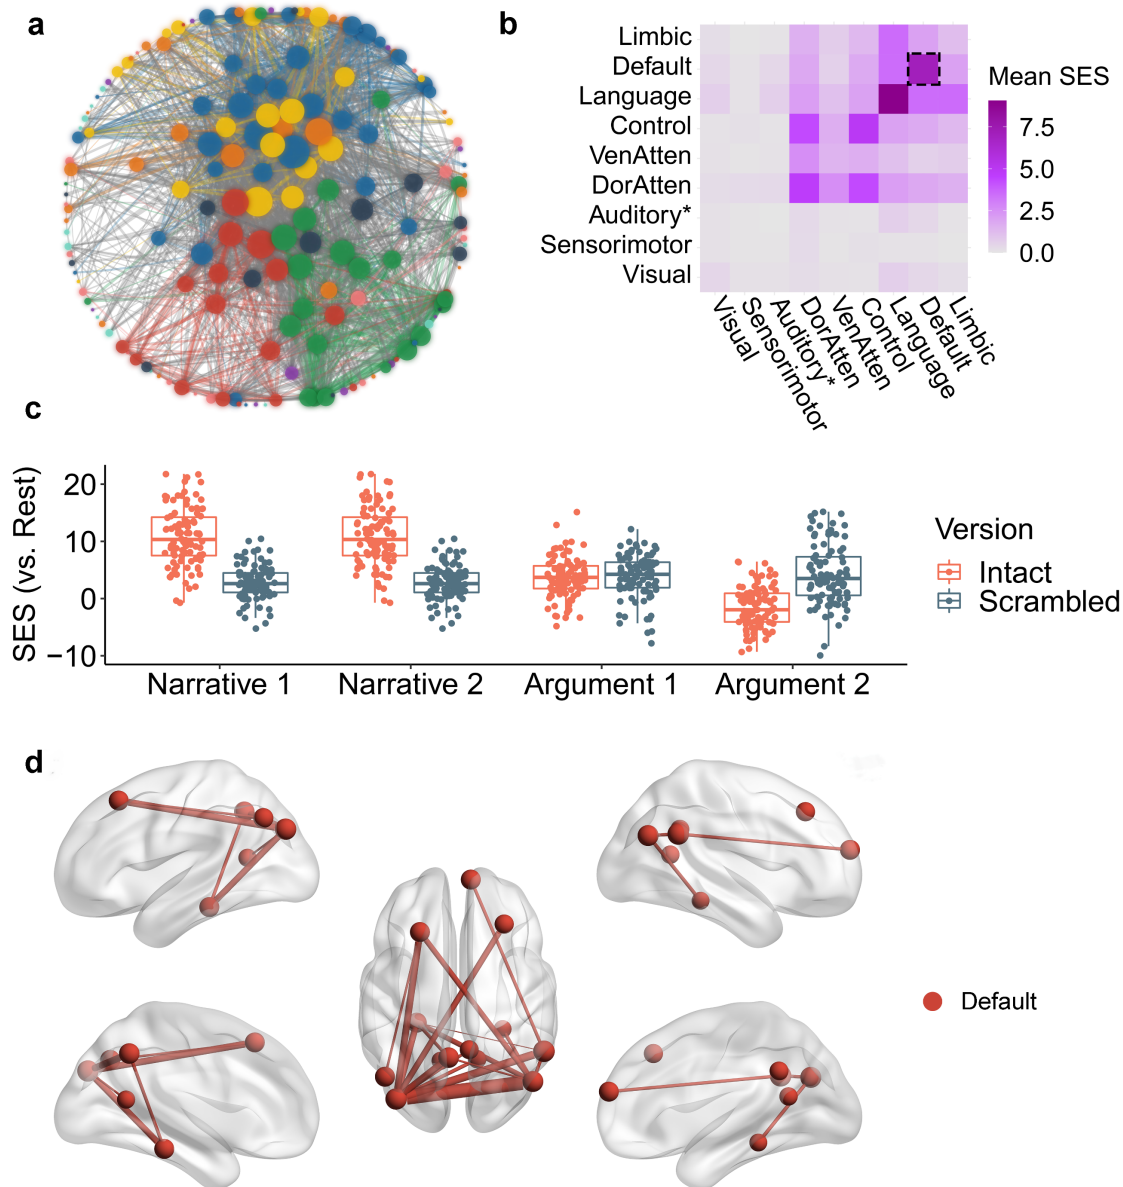

**Figure 6. The brain network specific to narrative thought.** Figure a illustrates the network layout of the brain network more sensitive to narrative thought using the force-directed graph drawing algorithm. It consisted of 2348 edges. The color legend is the same as the one in Figure 3 and Figure 4. Figure b illustrates the distribution of the 2348 edges within and between brain systems, where each cell indicates the mean standardized effect size (SES) in the "(intact-narrative – scrambled narrative) > (intact argumentative – scrambled argumentative)" contrast, i.e., the ratio between the sum of the SES and the number of the edges in the fully connected situation. There were 96 edges in DMN, which are highlighted using the dotted lines. Figure c illustrates the SES of the 96 edges in the DMN of all the conditions in contrast to the resting state. Figure d illustrates the top 20 edges within the 96 edges in the DMN with the largest SES in the "(intact-narrative – scrambled-narrative) > (intact-argumentative – scrambled-argumentative)" contrast. In Figure a and Figure d, the size of the nodes denotes the node degree of each brain area in the whole graph comprising 2348 edges. The color of the nodes denotes to which brain system they belong. The width of the edges denotes the SES. Intra-system edges are in the color of that network; inter-system edges are in gray.

## NARRATIVE AND ARGUMENTATIVE THOUGHT

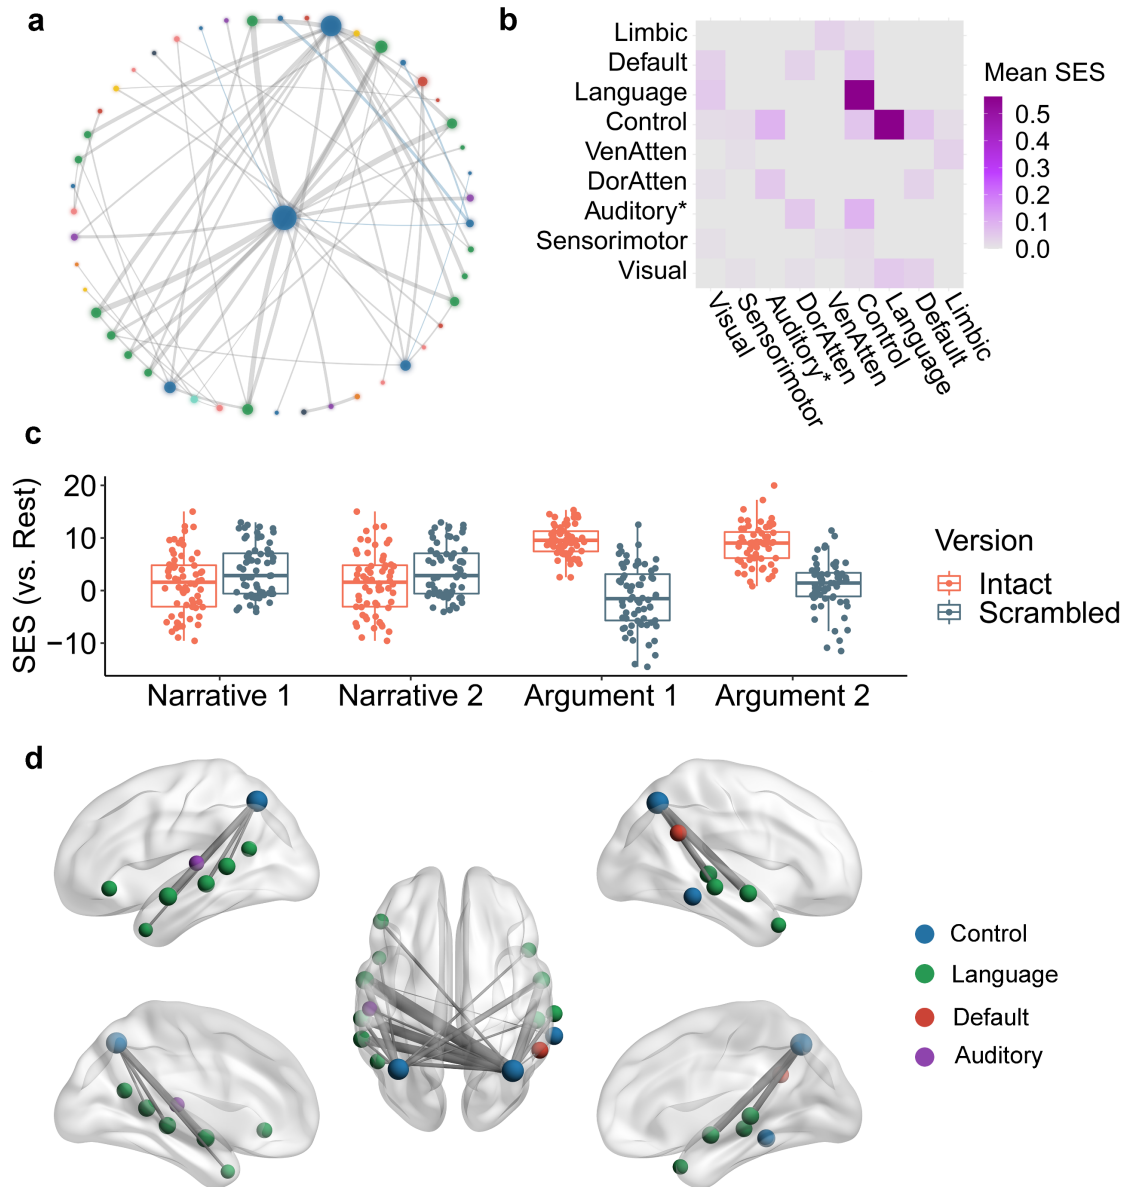

**Figure 7. The brain network specific to argumentative thought.** Figure a illustrates the network layout of the brain network specific to argumentative thought using the force-directed graph drawing algorithm. It consisted of 64 edges. The color legend is the same as the one in Figure 3 and Figure 4. Figure b illustrates the distribution of 64 edges within and between brain systems, where each cell indicates the mean standardized effect size (SES) in the "(intact argumentative – scrambled argumentative) > (intact-narrative – scrambled narrative)" contrast, i.e., the ratio between the sum of the SES and the number of the edges in the fully connected situation. Figure c illustrates the SES of the 64 edges of all the conditions in contrast to the resting state. Figure d illustrates the top 20 edges with the largest SES in the "(intact argumentative – scrambled argumentative) > (intact-narrative – scrambled narrative)" contrast. In Figure a and Figure d, the size of the nodes denotes the node degree of each brain area in the whole graph comprising 64 edges. The color of the nodes denotes to which brain system they belong. The width of the edges denotes the SES. Intra-system edges are in the color of that network; inter-system edges are in gray.
